# Supplementary material
Source: publisher site journal article supplement (https://www.dovepress.com/get_supplementary_file.php?f=451197.xlsx)
Supplement: Supplementary file 1 [file get_supplementary_file.php]

## Sheet: 正负离子模式差异代谢物整合
name	rt(min)	m/z	Metabolite name	Adduct type	con vs DM		con vs M		DM vs M		HMDB	KEGG	con					DM					M
					pvalue	Log2FC(DM/con)	pvalue	Log2FC(M/con)	pvalue	Log2FC(DM/M)			con1	con2	con3	con4	con5	DM1	DM2	DM3	DM4	DM5	M1	M2	M3	M4	M5
M454T35	0.581	454.388	11-Eicosenoylcarnitine	[M+H]+	0.299083	-0.508027	0.00849289	-0.893138	0.66097	0.385111	Acyl-carnitine	-	0.211737	0.208086	0.199168	0.211469	0.216303	0.111899	0.324064	0.244368	0.116758	0.0508347	0.150597	0.0868196	0.106705	0.082401	0.137099
M111T59	0.986	111.055	1-Acetylimidazole	[M+H]+	0.013718	0.948549	0.364814	-0.365419	0.000322039	1.31397	HMDB0243814	C02560	3.91618	4.19771	2.364	3.76234	1.19313	6.10698	5.30964	6.48386	5.35504	6.16794	2.25054	2.65248	2.68943	2.09336	2.29424
M100T168	2.793	100.04	1-Aminocyclopropane-1-carboxylate	[M-H]-	0.0148937	1.49356	0.00390496	1.57283	0.752985	-0.0792737	HMDB0036458	C01234	0.534601	0.854842	0.648756	0.500083	0.506695	1.664	1.86792	1.65353	1.68421	1.65599	2.2155	1.40441	1.59642	1.87957	1.96255
M102T90	1.503	102.127	1-Hexylamine	[M+H]+	0.000289857	2.86402	0.00495717	3.64327	0.0606922	-0.779256	HMDB0032323	C08306	9.21146	6.6121	9.34378	9.53369	8.00303	56.6806	61.844	76.0633	52.39	60.4889	71.8236	133.867	119.65	109.733	98.5118
M168T317	5.281	168.078	1-Methylhistidine	[M-H]-	0.0148937	-0.997119	0.0373443	-0.577778	0.121286	-0.419341	HMDB0000001	C01152	2.35066	3.26966	2.37132	2.04028	2.76307	1.16052	1.163	1.80601	1.09895	1.24491	1.62491	1.97549	1.78655	1.63916	1.54646
M162T544	9.062	162.076	2-Aminoadipic acid	[M+H]+	0.662283	0.0731018	0.0214204	0.467427	0.0184283	-0.394325	HMDB0000510	C00956	0.244743	0.273468	0.23118	0.175416	0.291248	0.278831	0.221773	0.231694	0.23951	0.30008	0.296199	0.351523	0.35334	0.351901	0.328407
M131T74	1.24	131.071	2-Hydroxy-4-methylpentanoic acid	[M-H]-	0.00700563	-0.879678	0.0258383	-0.548292	0.168828	-0.331386	HMDB0000665	-	3.72758	4.82551	5.0152	3.65694	3.85628	2.44383	2.17917	2.80661	2.8098	2.45048	3.35191	2.50479	2.78752	2.7926	2.97934
M103T139	2.311	103.04	2-Hydroxybutyric acid	[M-H]-	0.187	-0.353314	0.155994	0.28937	0.0140284	-0.642685	HMDB0000008	C05984	10.8519	7.94144	9.14203	10.5162	5.94875	8.08806	3.94306	6.83912	8.01887	8.35359	9.87152	11.5214	11.1289	11.5926	10.1475
M129T443	7.379	129.019	2-Hydroxyglutaric acid	[M-H]-	0.00594661	-2.21787	0.00834567	-2.04083	0.348601	-0.177047	HMDB0000694	C03196	4.05638	4.61371	4.78589	2.90906	5.16115	0.903447	0.553061	1.1507	0.897984	0.953827	0.956714	1.14956	1.08018	1.00067	1.04426
M117T99	1.654	117.056	2-Hydroxyvaleric acid	[M-H]-	0.00139421	-0.987237	0.0242865	-0.325669	0.0174611	-0.661568	HMDB0001863	-	10.9326	12.8411	10.9326	11.0937	9.9335	6.25872	4.07765	6.50354	6.14678	7.21495	8.51832	9.17138	8.51407	9.71855	8.54905
M145T429	7.144	145.014	2-Ketoglutaric acid	[M-H]-	0.00606821	-2.09106	0.0118598	-1.6362	0.0817381	-0.45486	HMDB0000208	C00026	3.95228	4.737	4.41238	3.11307	5.61312	1.11088	0.578013	1.42288	1.0354	1.22781	1.26599	1.55389	1.38856	1.39254	1.42108
M207T56	0.925	207.012	2-Naphthalenesulfonic acid	[M-H]-	0.0429956	0.979356	0.0258383	0.786769	0.162281	0.192587	HMDB0255446	C16202	0.593144	0.596409	0.768963	0.444411	0.471181	1.03551	1.71582	1.2389	1.23282	1.12802	1.02263	0.95289	1.01191	1.01878	0.952223
M258T154	2.567	258.108	2'-O-Methylcytidine	[M+H]+	0.0176938	-1.77437	0.0295913	-1.41579	0.124682	-0.35858	HMDB0242132	-	0.722688	1.42678	1.05237	0.659774	0.90361	0.274873	0.227469	0.404536	0.292189	0.256317	0.332626	0.385501	0.344993	0.353407	0.369502
M146T49	0.817	146.06	3-Formylindole	[M+H]+	0.53023	-0.268558	0.00268085	2.00144	0.0120406	-2.26999	HMDB0029737	C08493	0.309406	0.215228	0.529026	0.262736	0.212386	0.173899	0.172442	0.377987	0.212273	0.302522	1.40973	1.04052	1.04037	1.07509	1.5555
M117T122	2.037	117.056	3-Hydroxy-3-methylbutanoic acid	[M-H]-	0.36831	0.134902	0.0332287	0.323806	0.130588	-0.188903	HMDB0000754	C20827	0.764517	0.691229	0.667967	0.762663	0.532569	0.787337	0.57619	0.886251	0.76477	0.752696	0.847892	0.806182	0.943958	0.845552	0.835662
M103T175	2.916	103.04	3-Hydroxybutyric acid	[M-H]-	0.133806	-0.330286	0.0467925	0.393847	0.00270284	-0.724133	HMDB0000357	C01089	4.27443	3.46992	5.48484	3.92874	3.70389	3.81874	2.34709	3.11619	3.63324	3.66325	5.85106	5.2667	5.44665	5.46803	5.37776
M188T95	1.578	188.072	3-Indolepropionic acid	[M-H]-	0.000206396	2.51836	0.00789786	3.26978	0.0597991	-0.751425	HMDB0002302	-	0.0874251	0.179795	0.0954115	0.058986	0.0906073	0.553527	0.435842	0.665804	0.601341	0.619618	0.67036	1.29501	1.05197	1.09558	0.827497
M212T77	1.285	212.002	3-Indoxyl sulfate	[M-H]-	0.0925264	0.767816	0.0065489	2.18701	0.0149572	-1.41919	HMDB0000682	-	1.60203	2.53518	1.98291	0.720257	1.78802	3.35225	1.48826	4.55376	2.75904	3.41416	5.45948	10.1501	8.20817	8.5565	6.91596
M258T122	2.035	258.108	3-Methylcytidine	[M+H]+	0.0152749	0.354671	0.000363974	1.11435	0.00297309	-0.759679	HMDB0240577	-	0.22344	0.180982	0.239814	0.222703	0.192264	0.290857	0.242601	0.301156	0.27646	0.288826	0.396585	0.504522	0.457663	0.462554	0.471824
M168T366	6.098	168.078	3-Methylhistidine	[M-H]-	0.411493	0.358892	0.00766025	1.23528	0.0314583	-0.876392	HMDB0000479	C01152	0.182054	0.10566	0.091238	0.174223	0.212193	0.227828	0.0566097	0.130226	0.24154	0.246864	0.26291	0.457308	0.37556	0.363891	0.342219
M137T57	0.951	137.024	4-Hydroxybenzoic acid	[M-H]-	0.111107	0.780043	0.000258099	0.681079	0.805872	0.0989639	HMDB0000500	C00156	0.439932	0.41501	0.453988	0.47529	0.392735	0.492042	1.11196	0.84578	0.988692	0.806042	0.746148	0.684268	0.652317	0.681256	0.726408
M150T67	1.113	150.054	4-Hydroxymandelonitrile	[M+H]+	0.0120283	1.0696	0.000347143	1.26833	0.153078	-0.198722	HMDB0060318	C03742	0.864455	0.922456	0.95892	0.865249	0.955633	2.01531	1.36951	2.05285	1.92036	2.10508	1.99935	2.37606	2.26691	2.21132	2.14674
M181T152	2.538	181.051	4-Hydroxyphenyllactic acid	[M-H]-	0.00515214	-0.989073	0.0112177	-0.43925	0.0809729	-0.549823	HMDB0000755	C03672	0.467565	0.538916	0.468486	0.428741	0.536321	0.306282	0.223636	0.241546	0.294228	0.331737	0.334097	0.38899	0.392282	0.340726	0.343471
M138T36	0.602	138.02	4-Nitrophenol	[M-H]-	0.0247719	1.23435	0.0413295	0.594921	0.121286	0.639425	HMDB0001232	C00870	0.928732	0.784006	0.911738	0.829487	0.778609	1.54914	2.65439	1.53713	2.62037	2.49811	0.90973	1.56041	1.43507	1.27299	1.21463
M184T58	0.961	184.06	4-Pyridoxic acid	[M+H]+	0.501078	0.212332	0.00169166	1.00853	0.0299019	-0.796201	HMDB0000017	C00847	0.143579	0.123189	0.0736517	0.139301	0.104896	0.109191	0.223149	0.146672	0.109539	0.128031	0.200963	0.256111	0.24487	0.254316	0.219909
M154T54	0.904	154.05	5-Aminosalicylic acid	[M+H]+	0.592969	0.309454	0.0214204	0.946518	0.0217304	-0.637065	HMDB0014389	-	1.22224	1.23162	0.556935	1.29009	1.3901	1.32432	1.69315	1.92296	1.16925	1.23614	1.91363	2.41802	2.4055	2.20204	2.02857
M204T182_4	3.033	204.123	Acetylcarnitine	[M]+	0.101776	0.314143	0.018567	0.379609	0.727347	-0.0654663	HMDB0000201	C02571	173.031	239.004	207.549	180.429	212.565	289.351	225.794	240.32	287.788	295.762	248.91	263.694	264.702	272.127	267.922
M268T76_2	1.274	268.103	Adenosine	[M+H]+	0.015885	-1.09358	0.0887134	-0.538981	0.063592	-0.554597	HMDB0000050	C00212	78.2272	103.694	131.168	72.0264	121.587	59.7718	36.7481	47.4103	59.2813	57.7108	61.6045	74.8201	74.4787	69.6865	68.1509
M157T162	2.708	157.036	Allantoin	[M-H]-	0.0244064	0.32202	0.000766705	0.863559	8.05604e-05	-0.541539	HMDB0000462	C01551	5.29503	5.23715	5.66094	5.05077	3.95612	6.33763	5.9711	6.20945	6.56023	5.9809	8.91572	9.51062	9.43051	8.88052	9.11457
M241T461	7.69	241.129	Anserine	[M+H]+	0.105267	0.921945	0.00938572	2.09575	0.0453923	-1.17381	HMDB0000194	C01262	3.97264	2.1652	2.00826	3.78185	5.05256	7.42043	1.26921	3.94026	7.98589	8.59829	9.43494	19.6946	15.7372	15.38	12.3362
M448T36	0.601	448.34	Arachidonoylcarnitine	[M+H]+	0.020256	1.85637	0.00235558	2.05643	0.624557	-0.200065	HMDB0006455	-	0.0793102	0.286869	0.144122	0.00818256	0.106983	0.547642	0.556721	0.639954	0.571483	0.249948	0.613418	0.519714	0.541541	0.471933	0.455065
M456T34	0.574	456.403	Arachidoylcarnitine	[M+H]+	0.0120283	6.64137	0.0214204	6.22507	0.49888	0.416295	HMDB0006460	-	0	0.0093384	0	0	0.000766746	0.244282	0.363663	0.230815	0.22603	0.11038	0.168449	0.115999	0.162069	0.147279	0.162123
M175T599_1	9.989	175.118	Arginine	[M+H]+	0.00876873	-0.815662	0.001821	-1.11409	0.427093	0.298432	HMDB0000517	C00062	186.18	166.89	131.29	160.693	176.628	108.949	127.763	32.8366	94.2106	105.59	91.2848	60.9123	71.9891	73.035	82.3798
M131T327	5.452	131.046	Asparagine	[M-H]-	0.00631176	-2.40067	0.0146834	-1.34285	0.000365611	-1.05783	HMDB0000168	C00152	5.76328	7.52435	7.68591	5.03716	8.44126	1.07658	1.26898	1.70141	1.06814	1.36994	2.58476	2.90691	2.7797	2.76484	2.54617
M132T406	6.762	132.03	Aspartic acid	[M-H]-	0.030407	0.75881	0.00455378	0.99752	0.315997	-0.238709	HMDB0000191	C00049	3.99014	4.60195	3.47027	3.34746	4.09464	8.27481	3.78051	7.22328	7.58877	7.64269	6.39224	9.27121	8.09411	7.97067	7.21368
M187T301	5.023	187.098	Azelaic acid	[M-H]-	0.0955113	0.574538	0.0484963	0.595072	0.948971	-0.0205336	HMDB0000784	C08261	0.102452	0.179515	0.25886	0.253013	0.210374	0.238289	0.399368	0.332872	0.330869	0.32729	0.360426	0.27788	0.265699	0.292733	0.320177
M664T532	8.867	664.112	beta-Nicotinamide adenine dinucleotide	[M+H]+	0.00133456	-1.49502	0.00568782	-1.05429	0.325531	-0.440734	HMDB0000902	C00003	0.233506	0.185151	0.241386	0.229935	0.275915	0.0846539	0.0333452	0.162824	0.0717674	0.0929705	0.114671	0.109441	0.114702	0.120027	0.102577
M335T575	9.588	335.062	beta-Nicotinamide mononucleotide	[M+H]+	0.00339527	-3.87364	0.00558491	-2.77444	0.05221	-1.0992	HMDB0000229	C00455	0.161293	0.170479	0.189115	0.142827	0.246899	0.0178534	0.00580208	0.00607186	0.0130119	0.0259125	0.0270552	0.0300278	0.0220709	0.033172	0.0207633
M232T115	1.909	232.153	Butyrylcarnitine	[M+H]+	0.112636	0.268058	0.00243725	0.760725	0.0327875	-0.492667	HMDB0002013	C02862	10.3974	11.347	9.34591	9.79314	9.82825	13.2713	10.3968	14.0281	14.2148	12.7419	19.0818	15.0071	16.4238	16.6696	18.7407
M162T284_2	4.727	162.112	Carnitine	[M+H]+	0.000121572	-1.25201	0.00156128	-0.891136	0.024303	-0.360878	HMDB0000062	C00318	1727.87	1628.65	1459.93	1736.05	1578.97	617.849	822.657	727.398	627.728	658.912	890.934	871.245	883.705	886.513	852.01
M225T393	6.542	225.099	Carnosine	[M-H]-	0.913133	0.0704864	0.00718615	1.39105	0.0104556	-1.32056	HMDB0000033	C00386	14.3277	8.09797	9.31065	11.9799	25.6208	16.2885	3.1232	9.05772	15.9955	19.826	26.914	44.7832	38.3059	38.6086	33.2379
M407T73	1.212	407.28	Cholic acid	[M-H]-	0.0148937	3.07019	0.000308053	2.56689	0.282237	0.5033	HMDB0000619	C00695	0.206935	0.466273	0.219922	0.302377	0.204571	2.78911	1.64579	2.92689	2.75743	2.73462	1.55487	1.92749	1.74756	1.4232	1.64278
M191T543	9.05	191.02	Citric acid	[M-H]-	0.00363293	-1.58512	0.00758551	-1.05473	0.00666292	-0.530386	HMDB0000094	C00158	4.55549	4.23594	3.40976	3.86177	3.18743	1.47191	1.1885	1.07548	1.1419	1.3819	1.66898	1.9016	2.04023	1.9359	1.72017
M176T431	7.186	176.103	Citrulline	[M+H]+	0.0349255	-0.488121	0.235905	-0.209137	0.0371249	-0.278984	HMDB0000904	C00327	3.36042	4.03905	3.73342	2.6219	4.33602	2.50521	2.46171	2.9508	2.4373	2.65634	2.96454	3.21501	3.15268	3.23335	3.08396
M114T92	1.541	114.066	Creatinine	[M+H]+	0.000289857	0.623297	3.62859e-06	0.992328	0.00283639	-0.36903	HMDB0000562	C00791	96.7825	92.5225	88.2649	93.9905	85.9733	145.345	141.731	132.09	148.934	151.821	181.119	187.937	186.14	179.917	175.101
M200T358	5.964	199.969	Cysteine S-sulfate	[M-H]-	0.106443	-0.399509	0.0436923	-0.531321	0.586763	0.131812	HMDB0000731	C05824	0.427985	0.333776	0.351332	0.307689	0.257245	0.299372	0.163936	0.334164	0.267133	0.257869	0.201421	0.281873	0.237003	0.239229	0.201535
M112T87	1.444	112.05	Cytosine	[M+H]+	0.0120283	1.83169	0.0214204	1.50439	0.199689	0.3273	HMDB0000630	C00380	0.149264	0.154065	0.14866	0.149065	0.122128	0.546433	0.408332	0.641635	0.611718	0.523911	0.365136	0.48281	0.428886	0.393268	0.381606
M146T340_1	5.674	146.117	Deoxycarnitine	[M+H]+	0.0120283	-1.26674	0.0214204	-1.0433	0.0807006	-0.223443	HMDB0001161	C01181	38.7595	42.073	45.021	36.7721	73.8912	19.326	20.0206	21.1942	18.7954	19.2991	25.355	19.9179	22.6466	23.8223	23.0203
M391T50	0.831	391.285	Deoxycholic acid	[M-H]-	0.0134615	2.50207	0.00470335	1.99586	0.224247	0.506206	HMDB0000626	C04483	0.00953335	0.0569079	0.0336507	0.0172348	0.106333	0.244191	0.130207	0.436587	0.221744	0.258083	0.153072	0.1734	0.197267	0.163508	0.204829
M228T117	1.954	228.097	Deoxycytidine	[M+H]+	0.0387605	0.342172	0.0214204	0.986525	0.0371249	-0.644353	HMDB0000014	C00881	2.41781	1.83196	2.04905	2.2515	2.11745	3.01565	2.01099	2.72065	3.06529	2.98115	4.16782	4.45916	4.22909	4.14089	4.1402
M193T400	6.673	193.035	D-Glucuronic acid	[M-H]-	0.0148937	0.804902	0.00019928	1.33022	0.0242838	-0.525321	HMDB0000127	C00191	4.67302	4.77271	3.75383	3.59443	4.43524	8.23258	5.21693	7.21487	8.22555	7.75057	9.66519	11.745	10.7053	11.1356	10.1281
M307T31	0.513	307.264	Dihomolinoleic acid	[M-H]-	0.0469854	-4.3547	0.0506667	-4.62197	0.56281	0.267268	HMDB0061864	-	28.187	10.6053	16.9106	24.7542	50.2389	1.07597	1.49111	2.28802	1.5166	0.836173	1.03968	1.12579	1.06606	1.11023	0.965989
M106T212	3.539	106.086	Dimethanolamine	[M+H]+	0.238418	0.327367	0.0364786	1.25696	0.117165	-0.929591	-	-	2.71727	3.40224	5.41619	4.689	4.3399	5.48572	6.32371	3.78926	5.80519	6.39254	14.742	5.47505	8.853	9.35533	10.7222
M143T238_1	3.974	143.081	Ectoine	[M+H]+	0.00179186	-1.65751	0.0157361	-0.603945	0.00481875	-1.05356	HMDB0240650	C06231	16.5715	12.7313	16.2869	14.616	19.1018	4.97429	4.01817	6.70519	4.50182	5.28163	12.2606	8.7594	10.3411	10.414	10.4055
M309T31	0.509	309.279	Eicosenoic acid	[M-H]-	0.0319481	-4.71791	0.0362825	-4.65845	0.869745	-0.0594566	HMDB0002231	C16526	12.3641	4.9865	7.37224	13.4222	19.8714	0.373659	0.623288	0.66254	0.446678	0.347749	0.439764	0.496909	0.445369	0.485137	0.43012
M230T282	4.696	230.095	Ergothioneine	[M+H]+	0.000390399	3.07654	0.0214204	2.10371	0.0339125	0.972826	HMDB0003045	C05570	0.402942	0.219594	0.0655612	0.02172	0.318761	1.49683	1.31645	2.13828	1.60742	1.69131	0.5238	1.35541	0.91358	0.999408	0.628782
M259T475	7.917	259.022	Fructose-6-phosphate	[M-H]-	0.0148937	-4.51697	0.0258383	-3.2185	0.0618408	-1.29847	HMDB0000124	C00085	0.527238	0.10663	0.104397	0.601399	0.556415	0.0337107	0.00204719	0.00677639	0.0251404	0.0288498	0.020274	0.0554001	0.0447389	0.0485513	0.0347361
M115T476	7.936	115.004	Fumaric acid	[M-H]-	0.0148937	-1.15662	0.0740705	-0.754057	0.0242838	-0.402565	HMDB0000134	C00122	3.8663	4.74346	3.05346	3.12184	5.93988	1.9277	1.53036	1.91416	1.99129	1.94391	2.39035	2.51622	2.63154	2.5715	2.17891
M276T561	9.358	276.118	gamma-Glutamylglutamine	[M+H]+	0.020256	-0.755613	0.828065	0.0451565	0.0371249	-0.800769	HMDB0011738	C05283	0.695547	0.701416	0.738686	0.531158	0.466506	0.372808	0.322428	0.319022	0.332961	0.37452	0.541373	0.778576	0.708305	0.664799	0.539883
M195T317	5.287	195.051	Gluconate	[M-H]-	0.00645486	-1.55543	0.0277943	-0.817275	0.0218631	-0.738156	HMDB0000625	C00257	26.254	22.7365	28.0117	22.7121	36.7319	11.0599	3.58002	9.49846	11.4975	11.5427	15.8293	17.2303	15.4868	15.4016	13.4869
M179T327	5.448	179.056	Glucose	[M-H]-	0.0148937	0.949324	0.0258383	0.650704	0.00337146	0.298621	HMDB0000122	C00221	11.3796	11.6765	10.5534	11.1096	7.22375	20.2211	18.859	18.8603	20.7034	21.5964	15.6114	17.1984	16.4721	16.4308	15.8342
M259T508	8.47	259.022	Glucose-6-phosphate	[M-H]-	0.0148937	-5.02994	0.061559	-3.45319	0.0573669	-1.57675	HMDB0001401	C00092	0.357287	0.0913121	0.09805	0.330308	0.421555	0.00810974	0.00146875	0.00622917	0.0053918	0.0241287	0.0264638	0.0203332	0.0276079	0.0171127	0.0270412
M146T397_2	6.614	146.046	Glutamic acid	[M-H]-	0.0436137	-0.333327	0.0188094	-0.473802	0.353246	0.140475	HMDB0000148	C00025	190.306	218.407	219.974	169.017	193.543	162.217	125.24	201.381	155.817	163.478	136.946	147.096	145.198	142.817	141.706
M147T362_1	6.039	147.076	Glutamine	[M+H]+	0.00250851	-1.84854	0.00716495	-1.24005	0.00907175	-0.608489	HMDB0000641	C00064	54.2454	60.6694	69.9496	52.3035	75.737	15.6986	19.5442	15.4996	14.4249	17.0779	28.1321	25.6971	26.589	26.4275	25.6249
M274T434	7.227	274.104	Glutamylglutamine	[M-H]-	0.0148937	-1.05928	0.239766	-0.331881	0.0242838	-0.7274	HMDB0028817	-	2.35958	2.55676	3.05189	1.61992	1.68611	1.00107	0.935896	1.01988	0.948294	1.06732	1.54224	1.93528	1.79287	1.90425	1.78276
M105T261	4.358	105.019	Glyceric acid	[M-H]-	0.864873	-0.0685638	0.0194542	0.88687	0.00728722	-0.955433	HMDB0000139	C00258	18.6562	14.0985	8.8054	15.9183	7.15919	13.9764	5.84732	12.8413	13.2443	11.9408	19.4243	28.3256	24.8577	24.2707	22.6469
M171T439	7.317	171.006	Glycerol-3-phosphate	[M-H]-	0.0148937	-5.60579	0.0258383	-4.84066	0.282237	-0.765123	HMDB0000126	C00093	1.23129	0.821737	0.830045	1.15511	4.85843	0.00517687	0.00120744	0.00665632	0.00779971	0.183071	0.122679	0.00767753	0.049595	0.0723304	0.0582021
M75T227	3.79	75.0087	Glycolic acid	[M-H]-	0.950481	0.0125129	0.0258383	1.34431	0.0242838	-1.3318	HMDB0000115	C03547	2.27065	1.5591	1.98269	2.09859	1.833	2.13668	1.51136	1.6892	2.30197	2.17123	4.72142	5.10732	5.08068	5.13382	4.69766
M284T172	2.861	284.098	Guanosine	[M+H]+	0.00324306	1.36032	0.00241048	1.1801	0.4642	0.180222	HMDB0000133	C00387	0.188822	0.325834	0.307545	0.139038	0.321268	0.784466	0.528582	0.44912	0.632017	0.729868	0.511634	0.553748	0.588592	0.695956	0.556129
M274T59	0.982	274.201	Heptanoylcarnitine	[M+H]+	0.0120283	-1.21338	0.205902	-0.281428	0.201428	-0.931952	HMDB0013238	-	0.0949911	0.0856734	0.0896889	0.0857024	0.128072	0.0373157	0.0246899	0.0849994	0.0293695	0.0410702	0.221672	0.0466758	0.0478304	0.0428045	0.0393458
M260T66	1.099	260.185	Hexanoylcarnitine	[M+H]+	0.0541713	0.350262	0.00760392	0.409302	0.726447	-0.0590393	HMDB0000705	-	0.882973	0.981109	0.815345	0.862429	1.05528	1.20628	1.11217	1.40546	1.19481	1.30387	1.16726	1.23388	1.22086	1.25151	1.23169
M178T109	1.824	178.051	Hippuric acid	[M-H]-	0.186375	0.361751	0.000177353	1.14198	0.011766	-0.780231	HMDB0000714	C01586	2.73393	3.2733	3.01483	2.68114	2.09578	4.41818	3.09529	2.99391	4.01507	4.66938	5.96216	6.27896	5.74203	6.65608	5.81294
M112T245	4.082	112.087	Histamine	[M+H]+	0.00181235	1.61866	0.164897	0.463066	0.000490199	1.15559	HMDB0000870	C00388	5.10902	8.47753	5.30215	7.24842	2.3557	17.8804	17.5965	17.6166	16.7428	16.7903	7.26123	8.49588	9.37027	7.37837	6.77069
M154T522	8.696	154.062	Histidine	[M-H]-	0.0148937	-1.92269	0.0258383	-2.25318	0.373107	0.330497	HMDB0000177	C00135	0.766768	0.562313	0.641791	0.62583	1.59659	0.26651	0.240939	0.19964	0.211065	0.223871	0.192645	0.0570241	0.246743	0.156981	0.226196
M132T246	4.101	132.065	Hydroxyproline	[M+H]+	0.0409013	0.54304	0.00497218	1.32323	0.0474946	-0.780192	HMDB0000725	C01157	0.354043	0.268753	0.226988	0.19042	0.176412	0.401558	0.355422	0.326583	0.370227	0.378839	0.782683	0.454235	0.594293	0.585314	0.62777
M110T320	5.334	110.027	Hypotaurine	[M+H]+	0.0120283	-0.562234	0.0439974	-0.498131	0.867091	-0.0641032	HMDB0000965	C00519	1.11675	1.64762	1.45031	1.07755	1.40677	0.992652	0.820469	0.816547	1.01247	0.97698	0.947505	0.92895	1.00422	0.974781	0.887582
M269T125	2.08	269.087	Inosine	[M+H]+	0.977092	0.00690078	0.00575774	0.479463	0.0743437	-0.472563	HMDB0000195	C00294	4.84905	5.74827	4.48011	4.49123	5.55807	5.14068	5.71476	2.72782	4.87547	5.10741	6.76893	7.34525	7.06257	6.96204	6.89354
M132T153	2.557	132.102	Isoleucine	[M+H]+	0.0120283	0.697797	0.0214204	0.771347	0.525446	-0.0735495	HMDB0000172	C00407	8.76817	13.105	9.87188	9.01297	9.17663	15.2603	16.4122	18.2467	17.1871	16.9115	16.5199	17.7159	17.6242	18.0014	15.3703
M246T90	1.503	246.169	Isovalerylcarnitine	[M+H]+	0.655977	-0.0828578	0.0214204	0.288274	0.109273	-0.371132	HMDB0000688	-	5.99455	6.73283	5.63776	5.81164	7.17874	4.82531	6.49202	8.46412	5.56618	5.40773	7.77923	7.62879	7.62101	7.90053	7.36112
M190T109	1.81	190.05	Kynurenic acid	[M+H]+	0.873968	-0.0760626	0.00612679	1.5765	0.0112192	-1.65256	HMDB0000715	C01717	0.125835	0.073866	0.131163	0.102706	0.0878784	0.0610536	0.0438234	0.12952	0.056572	0.195212	0.213662	0.384951	0.346415	0.312308	0.297861
M209T144	2.407	209.091	Kynurenine	[M+H]+	0.914117	-0.0741895	0.0113014	2.27197	0.0254363	-2.34616	HMDB0000684	C00328	0.199478	0.0664439	0.195132	0.134346	0.105302	0.0388219	0.0368988	0.220828	0.0680198	0.265315	0.411711	0.900188	0.78885	0.731996	0.551526
M132T141	2.344	132.102	Leucine	[M+H]+	0.00207496	0.563533	0.0174418	0.343227	0.0855043	0.220306	HMDB0000687	C00123	15.8816	19.6667	19.092	15.4416	19.7299	25.2817	26.6509	31.0565	25.6605	27.7737	22.2991	22.3968	23.8736	23.5841	21.7807
M424T37	0.61	424.341	Linoleoylcarnitine	[M+H]+	0.045583	1.42469	0.000147679	1.53117	0.825798	-0.106482	HMDB0240780	-	0.436495	0.512319	0.336665	0.377931	0.33646	1.12776	1.36332	1.65797	1.38741	0.611046	1.3046	1.1313	1.14086	1.02128	1.182
M512T40	0.668	512.299	LPC 14:0	[M+FA-H]-	0.0355871	-2.25002	0.0378931	-2.58562	0.49518	0.335603	lipid	-	2.68169	1.02974	1.45125	2.7378	3.45725	0.342253	0.834364	0.71847	0.445208	0.326181	0.40048	0.351239	0.41766	0.338136	0.384573
M526T40	0.664	526.315	LPC 15:0	[M+FA-H]-	0.0402237	-2.24974	0.0413295	-2.65354	0.316184	0.4038	lipid	-	5.00143	1.67753	2.69266	5.48021	2.82352	0.69955	1.11802	1.01698	0.776466	0.569511	0.55804	0.559658	0.560608	0.53002	0.600803
M540T39	0.657	540.329	LPC 16:0	[M+FA-H]-	0.0148937	-1.13358	0.0203924	-1.39273	0.54187	0.259158	lipid	-	37.6599	24.2474	27.5442	41.4447	42.1382	15.2475	25.5168	19.5481	18.7284	10.4475	12.2717	13.7551	13.5185	12.9105	13.4431
M538T40	0.663	538.313	LPC 16:1	[M+FA-H]-	0.0148937	-2.11498	0.0229264	-2.43944	0.519753	0.324465	lipid	-	7.525	3.51754	4.84462	7.78385	8.2132	1.07124	2.59826	2.26336	1.30542	0.984074	1.23396	1.16941	1.14288	1.11877	1.213
M566T39	0.652	566.345	LPC 18:1	[M+FA-H]-	0.0203901	-2.63362	0.0258383	-2.91401	0.539937	0.280398	lipid	-	27.2339	12.7481	18.3187	30.6964	35.8918	3.36985	6.19953	6.26691	4.42506	2.34299	3.49146	3.25676	3.28117	3.20162	3.33882
M594T38	0.632	594.378	LPC 20:1	[M+FA-H]-	0.0364234	-3.05576	0.0399236	-3.24867	0.672211	0.192901	lipid	-	0.748823	0.399338	0.670774	0.803131	1.46917	0.0888078	0.127114	0.130035	0.14872	0.0697215	0.0996154	0.0668484	0.0751147	0.0780843	0.110773
M588T39	0.65	588.331	LPC 20:4	[M+FA-H]-	0.0186988	1.33048	0.000200713	1.68897	0.19013	-0.358488	lipid	-	0.680995	0.62165	0.447601	0.452656	0.369125	1.23027	1.7079	1.83544	1.15957	0.615872	1.51182	1.90978	1.69061	1.56903	1.61167
M452T40	0.671	452.278	LPE 16:0	[M-H]-	0.159198	-0.495418	0.00715918	-1.19417	0.190383	0.698755	lipid	-	8.77082	5.92423	6.71801	7.77676	9.37633	5.22261	8.02822	8.08206	6.39851	3.08094	2.24395	4.0465	4.27242	3.30997	2.98199
M450T40	0.671	450.261	LPE 16:1	[M-H]-	0.101405	-0.500434	0.0146454	-1.09344	0.145478	0.593005	lipid	-	1.16464	1.46119	1.41294	1.13014	1.81389	1.00729	1.37274	1.13632	1.27537	0.602132	0.635769	0.675977	0.783392	0.614013	0.563289
M480T40	0.663	480.307	LPE 18:1	[M+H]+	0.00983348	-1.66882	0.0123183	-2.05081	0.475819	0.38199	lipid	-	17.849	10.6925	13.7173	17.6082	22.358	5.70287	5.86206	7.80456	7.31245	2.53366	3.00012	5.05919	4.58618	3.47778	3.72166
M476T40	0.672	476.278	LPE 18:2	[M-H]-	0.249406	-0.495405	0.0258383	-0.642786	0.715465	0.14738	lipid	-	1.33194	1.31537	2.0305	1.98411	1.39395	1.24975	1.32714	1.59089	1.56353	0.70896	0.788186	1.16912	1.23367	1.00186	0.966745
M506T40	0.66	506.324	LPE 20:1	[M-H]-	0.0162503	-3.02555	0.0227888	-3.28322	0.586304	0.257669	lipid	-	2.26682	1.19187	1.99205	2.33063	3.4207	0.266645	0.350352	0.481379	0.305513	0.146166	0.197472	0.271762	0.238978	0.210787	0.231672
M504T40	0.666	504.309	LPE 20:2	[M-H]-	0.0721677	-0.773322	0.0405778	-0.877307	0.838386	0.103985	lipid	-	0.454259	0.354178	0.668986	0.57385	0.693311	0.323549	0.396456	0.566947	0.361556	0.170329	0.23067	0.364645	0.320324	0.271884	0.30658
M436T40	0.668	436.283	LPE O-16:1	[M-H]-	0.0193198	-1.28182	0.0159087	-2.17498	0.155759	0.89316	lipid	-	18.9188	9.20797	10.8972	14.0076	16.655	5.29668	6.92552	10.4382	5.90217	3.60717	1.84596	4.2275	3.58082	3.03507	2.74236
M462T40	0.662	462.299	LPE O-18:2	[M-H]-	0.0148937	-2.87413	0.0176709	-3.74363	0.218562	0.8695	lipid	-	90.0624	43.2025	53.1255	50.7053	86.3221	7.78287	8.22082	19.5303	8.37002	5.18308	2.85661	7.11088	5.38245	4.71571	4.07892
M490T39	0.65	490.33	LPE O-20:2	[M-H]-	0.0148937	-3.80199	0.0198812	-4.62804	0.544856	0.826054	lipid	-	1.11297	0.434343	0.537829	0.816877	0.917541	0.0433981	0.0321937	0.156157	0.049718	0.0293032	0.0106811	0.0440654	0.0435425	0.0292613	0.0269163
M483T38	0.641	483.272	LPG 16:0	[M-H]-	0.837881	-0.129293	0.0418329	-0.587024	0.370756	0.457731	lipid	-	0.865964	0.765745	0.894641	0.947483	1.52509	0.858229	1.17003	1.50852	1.17798	0.520255	0.545257	0.819274	0.729756	0.629605	0.603967
M509T40	0.661	509.288	LPG 18:1	[M-H]-	0.0148937	-2.25706	0.0258383	-2.78699	0.544856	0.529929	lipid	-	0.813068	1.06736	1.17433	0.764846	1.60172	0.280203	0.228329	0.0279952	0.374196	0.255401	0.262876	0.0120817	0.247219	0.0130485	0.250258
M597T41	0.684	597.303	LPI 18:1	[M-H]-	0.042123	-4.72773	0.0468737	-4.76328	0.95164	0.0355521	lipid	-	1.73555	0.320499	0.672892	1.74271	1.80933	0.0367085	0.0490258	0.0941835	0.0464369	0.0311033	0.0482553	0.0350459	0.0579833	0.0491287	0.0408667
M510T59	0.981	510.284	LPS 17:0	[M-H]-	0.047935	-6.11062	0.056608	-4.42886	0.162281	-1.68176	lipid	-	0.705407	0.126546	0.274415	0.84487	0.503699	0	0.0155738	0.00881645	0.00321579	0.00898505	0.0337347	0.00646704	0.0110594	0.0200757	0.0426413
M524T58	0.971	524.299	LPS 18:0	[M-H]-	0.047935	-3.98742	0.0532317	-3.9043	0.82325	-0.0831217	lipid	-	12.8057	2.76035	4.13028	13.825	10.7415	0.627062	0.461556	0.948131	0.621135	0.412864	0.664586	0.557173	0.575003	0.594392	0.565014
M522T59	0.985	522.284	LPS 18:1	[M-H]-	0.0409009	-5.73776	0.0463299	-5.41368	0.389252	-0.324081	lipid	-	8.57096	2.54099	3.73865	8.41237	12.5699	0.128431	0.103402	0.260213	0.142242	0.0985084	0.160092	0.17308	0.177616	0.18095	0.148888
M550T57	0.954	550.313	LPS 20:1	[M-H]-	0.0398544	-8.8463	0.0450721	-6.48814	0.113868	-2.35815	lipid	-	1.18168	0.26052	0.437041	1.2299	1.37491	0.00261781	0.0035489	0	0.00251045	0	0.0177769	0.000279293	0.00878819	0.0120968	0.01101
M544T60	0.993	544.265	LPS 20:4	[M-H]-	0.037424	-2.20752	0.0541184	-1.73311	0.215289	-0.47441	lipid	-	0.682594	0.25612	0.348626	0.615489	0.841205	0.105437	0.0810467	0.20542	0.121469	0.0825244	0.120919	0.237808	0.157094	0.15414	0.155451
M147T605	10.087	147.112	Lysine	[M+H]+	0.00683268	-0.789583	0.0214204	-0.547542	0.163008	-0.242041	HMDB0000182	C00047	40.1711	35.9516	37.4705	38.9695	51.7852	26.1185	20.9126	23.3205	26.9253	27.6598	25.6221	30.9612	29.0774	27.4436	26.7073
M133T500	8.338	133.014	Malic acid	[M-H]-	0.00568721	-2.30187	0.0387383	-0.769949	0.0118313	-1.53192	HMDB0000744	C03668	26.1698	20.5941	20.8891	16.6127	30.6891	7.69859	1.49262	3.38325	6.10269	7.19295	10.3316	18.1364	14.038	13.141	11.7669
M161T387	6.455	161.046	Meglutol	[M-H]-	0.040106	-1.78478	0.0258383	-0.953436	0.0573669	-0.831344	HMDB0000355	C03761	1.85922	4.1131	2.50268	1.49933	2.21431	0.577414	0.386252	0.912957	0.893416	0.751593	0.80459	1.3854	1.30426	1.39715	1.40283
M127T103	1.722	127.072	Melamine	[M+H]+	0.0694508	0.878333	0.000737019	1.17616	0.405835	-0.297831	HMDB0041922	C08737	0.25378	0.195239	0.211886	0.217886	0.118554	0.319879	0.59311	0.36056	0.422012	0.374696	0.424727	0.504199	0.46724	0.456788	0.400801
M150T173	2.877	150.058	Methionine	[M+H]+	0.0937436	0.302883	0.0264933	0.327885	0.891445	-0.0250024	HMDB0000696	C00073	5.00815	5.42074	5.00007	4.62238	6.42841	6.86676	6.08531	8.41871	6.36338	6.63095	6.89735	6.49205	6.70799	6.63944	6.49982
M227T33	0.549	227.201	Myristic acid	[M-H]-	0.0217863	-1.03418	0.0363513	-0.880934	0.469789	-0.153246	HMDB0000806	C06424	3.80841	2.98994	3.01495	4.54963	5.24701	1.72682	1.96456	2.72714	1.85875	1.64646	1.82188	2.59343	1.99509	2.22112	2.01698
M225T33	0.555	225.185	Myristoleic acid	[M-H]-	0.0148937	0.963864	0.0008569	1.0687	0.218562	-0.104833	HMDB0002000	C08322	0.339981	0.444924	0.378147	0.370813	0.407068	0.523072	0.683368	1.31586	0.6751	0.761045	0.787736	0.841592	0.695758	0.876482	0.869615
M372T38	0.635	372.31	Myristoylcarnitine	[M+H]+	0.0356434	1.3134	0.00497218	1.35325	0.943016	-0.0398497	HMDB0005066	-	0.240676	0.39334	0.263836	0.201133	0.175096	0.696183	1.02004	0.678765	0.760558	0.384311	0.857725	0.524292	0.578968	0.616707	0.67741
M104T196	3.26	104.07	N,N-Dimethylglycine	[M+H]+	0.0520687	0.316235	0.000145532	1.03438	0.00123769	-0.718143	HMDB0000092	C01026	2.55294	3.42167	2.88744	2.38222	2.89329	3.8777	3.12043	4.07806	3.32914	3.84471	5.40766	6.01635	5.96108	6.02595	5.54592
M189T591	9.857	189.159	N6,N6,N6-Trimethyl-L-lysine	[M+H]+	7.73007e-05	0.971207	0.000185838	1.46271	0.00756673	-0.491506	HMDB0001325	C03793	6.1942	6.4629	5.2441	5.07863	6.06708	11.5762	11.277	11.4606	12.2022	11.9536	15.3193	16.1644	14.5151	16.3362	17.7258
M303T525	8.745	303.084	N-Acetylaspartylglutamic acid	[M-H]-	0.0398544	-4.4815	0.0258383	-4.15286	0.162281	-0.32864	HMDB0001067	C12270	0.042354	1.23402	0.431155	0.0431216	0.145753	0.00510953	0.0055874	0.0078872	0.00619855	0.0120441	0.014393	0.0242283	0.0234998	0.0266241	0.0178644
M220T166	2.768	220.083	N-Acetylglucosamine	[M-H]-	0.00167714	1.8148	0.00549037	1.49437	0.00669673	0.32043	HMDB0000215	C00140	1.12537	1.94037	1.31608	0.95851	0.39889	3.94625	3.83867	3.89874	4.14656	3.87302	3.15854	3.06905	3.14647	3.5697	3.22593
M188T416	6.933	188.056	N-Acetylglutamic acid	[M-H]-	0.325765	-0.519048	0.479291	0.287925	0.0113569	-0.806973	HMDB0001138	C00624	0.119262	0.302241	0.168591	0.102174	0.127896	0.123911	0.094124	0.126737	0.108417	0.125439	0.166568	0.239324	0.191006	0.203551	0.200875
M220T149	2.491	220.083	N-Acetylmannosamine	[M-H]-	7.28058e-06	2.82186	0.0258383	2.29691	0.0242838	0.524955	HMDB0001129	C00645	0.544877	0.923184	0.744993	0.503559	0.411348	4.05019	4.87853	4.10239	4.55346	4.23686	3.98031	1.67262	3.85816	2.02679	3.83306
M190T105	1.755	190.054	N-Acetylmethionine	[M-H]-	0.134233	0.664588	0.0258383	1.00867	0.0261913	-0.344079	HMDB0011745	C02712	0.196886	0.379256	0.219589	0.177021	0.185481	0.374432	0.347039	0.433208	0.371488	0.354017	0.4045	0.524253	0.474566	0.486311	0.440793
M308T337	5.614	308.099	N-Acetylneuraminic acid	[M-H]-	0.00825863	0.940514	0.000683924	1.17747	0.155689	-0.236956	HMDB0000230	C19910	0.447015	0.472411	0.422301	0.399209	0.430473	0.775223	0.602227	0.930326	0.812628	0.815997	0.863952	1.06011	1.00661	1.01808	0.962548
M206T78	1.306	206.082	N-Acetylphenylalanine	[M-H]-	0.0228325	-0.755704	0.0429196	-0.600121	0.220359	-0.155583	HMDB0000512	C03519	0.378868	0.296959	0.393029	0.370948	0.513031	0.249322	0.176755	0.249625	0.219295	0.254162	0.278942	0.262339	0.23059	0.277959	0.238452
M131T192	3.198	131.118	N-Acetylputrescine	[M+H]+	0.0841379	0.32025	0.00159993	0.739096	0.0371249	-0.418846	HMDB0002064	C02714	0.28912	0.230453	0.318545	0.222513	0.264204	0.259254	0.383427	0.381472	0.276282	0.37826	0.455594	0.450399	0.436905	0.461995	0.406429
M146T226	3.772	146.046	N-Acetylserine	[M-H]-	0.0259364	0.856861	0.00281587	2.06336	0.00442407	-1.2065	HMDB0002931	-	0.720072	0.653742	0.650832	0.589684	0.501305	1.27136	0.730403	1.12189	1.40844	1.45833	2.07129	2.96882	2.85019	2.7644	2.36736
M163T756	12.6	163.123	Nicotine	[M+H]+	0.000602123	1.11874	0.00205481	0.896867	0.156407	0.221873	HMDB0014330	C16150	0.223931	0.226917	0.236569	0.245337	0.192624	0.420609	0.524592	0.505625	0.454598	0.445947	0.453142	0.348543	0.420016	0.413222	0.460549
M158T98	1.634	158.082	N-Isovalerylglycine	[M-H]-	0.00391074	1.95803	0.000779471	1.89256	0.769603	0.0654676	HMDB0000678	-	0.322102	0.474356	0.453365	0.398499	0.311153	1.85337	1.4336	1.76728	1.32175	0.970908	1.66195	1.29496	1.28642	1.57175	1.46035
M154T66	1.099	154.097	N-omega-Acetylhistamine	[M+H]+	0.0120283	1.18732	0.00012513	0.930816	0.201428	0.256505	HMDB0013253	C05135	0.287951	0.250294	0.238699	0.294357	0.318275	0.697219	0.671232	0.641624	0.723297	0.73358	0.480639	0.55193	0.545389	0.536701	0.534367
M286T56	0.94	286.2	Octenoylcarnitine	[M+H]+	0.0120283	-1.73254	0.0226793	-1.47367	0.201428	-0.258871	Acyl-carnitine	-	0.312584	0.315106	0.239965	0.329082	0.514571	0.0966853	0.151022	0.0915727	0.0850241	0.0946373	0.13807	0.114874	0.116567	0.11891	0.127762
M281T31_1	0.522	281.248	Oleic acid	[M-H]-	0.0215351	-3.37522	0.0258383	-3.75741	0.377314	0.38219	HMDB0000207	C00712	293.831	157.724	199.033	310.388	450.659	23.0692	36.1877	45.2739	28.8801	17.7804	20.6872	22.6349	20.4372	21.6552	18.9687
M140T491	8.187	140.012	O-Phosphoethanolamine	[M-H]-	0.0148937	-7.1671	0.0258383	-5.75601	0.162281	-1.4111	HMDB0000224	C00346	2.29801	0.90664	1.57688	2.29627	7.33745	0.0016982	0.00130311	0.00465899	0.00217057	0.108094	0.0962904	0.0179442	0.034914	0.0515365	0.0660571
M133T605	10.088	133.097	Ornithine	[M+H]+	0.325816	0.274953	0.012596	1.07341	0.0461457	-0.798459	HMDB0000214	C00077	6.63029	6.12618	8.32029	6.6219	6.79949	7.9305	5.12906	12.7803	9.4557	8.87264	11.1604	18.0527	16.6111	14.4154	12.3585
M613T598	9.969	613.157	Oxidized glutathione	[M+H]+	0.0120283	-5.42818	0.0214204	-3.20098	0.00776091	-2.2272	HMDB0003337	C00127	0.220892	0.171048	0.139002	0.156505	0.652774	0.00544686	0	0	0.00725965	0.0144954	0.0393229	0.0234691	0.0291238	0.0287496	0.0250768
M255T32	0.53	255.232	Palmitic acid	[M-H]-	0.0111372	-1.07734	0.013193	-1.27127	0.455564	0.193924	HMDB0000220	C00249	55.4555	40.6	39.2589	60.4306	59.7767	22.8977	31.7727	31.4085	25.4043	18.0344	17.864	24.6038	21.838	21.8323	19.7235
M253T32	0.536	253.217	Palmitoleic acid	[M-H]-	0.0174815	-1.89312	0.0253133	-2.06354	0.576098	0.170426	HMDB0003229	C08362	29.9974	20.8537	23.7755	31.709	45.7295	6.44839	8.30796	13.5041	7.93726	7.2366	7.42356	7.57801	6.91423	7.59135	6.8711
M400T37	0.61	400.341	Palmitoylcarnitine	[M+H]+	0.0271534	2.66181	0.00175826	2.58784	0.900958	0.073971	HMDB0000222	C02990	0.750356	0.893878	0.733092	0.655059	0.606492	5.0078	8.40745	4.76499	5.68933	2.34569	5.24904	3.63548	4.33962	4.05053	4.60212
M218T173	2.875	218.103	Pantothenic acid	[M-H]-	0.00590297	-1.77548	0.00852642	-1.39089	0.0071644	-0.384592	HMDB0000210	C00864	11.5029	11.3708	12.0257	10.0261	15.5834	3.52383	3.15724	3.58705	3.58512	3.94285	4.87693	4.12103	4.69387	4.51283	4.86917
M803T32	0.534	802.565	PC 34:2|PC 16:0_18:2	[M+FA-H]-	0.00274508	1.59551	0.000743648	1.45178	0.486044	0.14373	lipid	-	0.333505	0.652529	0.602076	0.400487	0.434351	1.79602	1.79728	1.48366	1.4912	1.09916	1.06978	1.46309	1.43739	1.37042	1.28718
M757T32	0.528	756.551	PC 34:3|PC 16:0_18:3	[M+H]+	0.0120283	1.67502	0.00558722	1.43603	0.589636	0.238989	lipid	-	0.410062	0.645991	0.563653	0.382375	0.532815	1.93251	2.03991	1.81359	2.02803	0.955429	1.04035	1.68596	1.5639	1.38591	1.1827
M787T31	0.524	786.599	PC 36:2|PC 18:1_18:1	[M+H]+	0.0120283	-0.688791	0.0122951	-0.634292	0.956762	-0.054499	lipid	-	8.80934	9.11299	9.11068	8.94342	9.47268	7.45597	6.48426	7.0948	6.92029	2.92608	4.2933	7.17986	6.67109	6.00327	5.13338
M827T32	0.537	826.565	PC 36:4|PC 16:0_20:4	[M+FA-H]-	0.00102092	3.12985	0.00320427	2.73054	0.147378	0.399313	lipid	-	0.0138422	0.34869	0.19695	0.133645	0.0364684	1.47427	1.61882	1.28367	1.37236	1.03734	0.706053	1.30054	1.02745	0.880308	0.928005
M781T32	0.532	780.551	PC 36:5|PC 16:1_20:4	[M+Na]+	0.00101134	2.06142	0.0244701	1.67379	0.267279	0.387625	lipid	-	0.406993	0.603909	0.448236	0.361811	0.486441	2.26976	1.87009	2.07769	2.30249	1.42849	0.901526	2.19117	1.68703	1.40545	1.1766
M811T31	0.515	810.598	PC 38:4|PC 18:0_20:4	[M+H]+	0.0120283	2.43443	0.0139267	2.28369	0.761209	0.15074	lipid	-	1.29353	1.57726	1.13148	1.03695	0.647647	8.4129	7.12071	6.97027	7.96525	3.15992	3.51676	7.72824	6.41965	5.6181	4.40796
M809T31	0.521	808.582	PC 38:5|PC 18:1_20:4	[M+H]+	0.0178006	1.40221	0.0349441	1.0422	0.42157	0.360013	lipid	-	1.01402	1.63437	1.29596	0.743422	0.92103	3.8851	3.40869	3.35085	3.92977	1.6304	1.40015	3.21427	2.674	2.36708	1.89507
M807T31	0.515	806.563	PC 38:6|PC 18:2_20:4	[M+H]+	0.0119858	2.26528	0.0214204	1.89507	0.458167	0.370208	lipid	-	0.309569	0.783612	0.385469	0.198027	0.229343	2.49697	1.89399	1.88653	2.69189	1.07087	0.806124	2.07767	1.70048	1.40237	1.10262
M727T33	0.544	726.547	PE O-36:3|PE O-18:2_18:1	[M-H]-	0.0310271	-3.61994	0.0258383	-4.95472	0.447249	1.33479	lipid	-	0.414099	1.15142	0.708514	0.871492	0.334166	0.0402125	0.00689635	0.0845638	0.017129	0.0159226	0.00475153	0.00237132	0.0101687	0.0478044	0.0471113
M723T32	0.541	722.514	PE O-36:5|PE O-16:1_20:4	[M-H]-	0.00947018	3.05557	0.0340056	2.35522	0.159668	0.700348	lipid	-	0.0857041	0.170888	0.0319782	0.0987027	0.00870261	0.822553	0.320546	0.816206	0.684749	0.401604	0.187719	0.674765	0.43309	0.390786	0.33974
M751T32	0.54	750.55	PE O-38:5|PE O-18:1_20:4	[M-H]-	0.040106	1.58081	0.332622	0.534506	0.117786	1.04631	lipid	-	0.150575	0.22118	0.12526	0.108125	0.0396934	0.416921	0.188959	0.588382	0.291634	0.215315	0.0553478	0.266717	0.225035	0.195191	0.191714
M729T33	0.542	728.555	PE P-36:2|PE P-18:1_18:1	[M+H]+	0.0120283	-3.11319	0.0214204	-3.40728	0.632761	0.294088	lipid	-	0.538846	1.70692	0.786775	0.682321	0.602428	0.0880017	0.0561527	0.1224	0.0872846	0.0450615	0.0553108	0.0990848	0.0852822	0.0901621	0.0770886
M241T32	0.537	241.217	Pentadecanoic acid	[M-H]-	0.0150881	-1.88644	0.0245328	-1.86513	0.948971	-0.0213131	HMDB0000826	C16537	4.07945	2.31309	2.88094	5.09283	4.26108	0.837636	1.3629	1.34866	1.05042	0.840855	0.922535	1.12771	0.978898	1.1069	0.977141
M774T29	0.481	773.539	PG 36:2|PG 18:1_18:1	[M-H]-	0.0148937	-4.39766	0.0258383	-4.22062	0.782961	-0.177039	lipid	-	0.269807	0.255763	0.267596	0.192494	0.252485	0.00985353	0.00258516	0.0143008	0.0121852	0.00750038	0.00558931	0.0142138	0.0198763	0.0157243	0.0110073
M192T96	1.595	192.066	Phenylacetylglycine	[M-H]-	0.0925264	-0.767467	0.0258383	0.989699	0.0242838	-1.75717	HMDB0000821	C05598	0.903427	1.31018	2.17829	0.963962	0.889129	0.445835	0.466966	1.56455	0.440439	0.728484	2.62759	2.51235	2.35876	2.58965	2.31275
M166T135	2.254	166.086	Phenylalanine	[M+H]+	0.0110944	0.500018	0.00603506	0.370864	0.399595	0.129154	HMDB0000159	C00079	12.145	14.7008	12.7995	12.1734	13.9986	19.7358	15.411	22.3283	17.9032	20.3301	15.3722	18.7001	16.9238	17.6397	16.4743
M184T598	9.969	184.073	Phosphocholine	[M]+	0.0120283	-5.41977	0.0214204	-4.04359	0.201428	-1.37618	HMDB0001565	C00588	16.8439	11.7819	12.0579	16.7001	36.8032	0.817394	0.21712	0.193882	0.281035	0.915913	2.2073	0.677513	0.798016	0.904432	1.12424
M212T579	9.658	212.043	Phosphocreatine	[M+H]+	0.0349255	-2.26227	0.0604013	-1.98576	0.201428	-0.276507	HMDB0001511	C02305	0.443209	0.112365	0.0764857	0.439369	0.458675	0.0400101	0.00895364	0.0114259	0.0318619	0.253043	0.0865473	0.0725003	0.0752885	0.0740326	0.077951
M97T485	8.091	96.9697	Phosphoric acid	[M-H]-	0.0118194	-4.53387	0.0131554	-4.09534	0.584517	-0.43853	HMDB0002142	C00009	9.92344	7.05742	6.70135	9.22131	13.8513	0.575244	0.980016	0.0496186	0.571678	0.180439	0.823154	0.584055	0.123781	0.616549	0.587777
M318T34	0.559	318.299	Phytosphingosine	[M+H]+	0.414789	-0.247932	0.756719	0.0829552	0.04218	-0.330887	HMDB0004610	C12144	13.237	11.0437	17.3553	8.0633	18.9745	11.6153	14.294	10.2043	12.1192	11.0432	16.4151	13.8195	13.579	14.1141	14.8107
M886T37	0.614	885.557	PI 38:4|PI 18:0_20:4	[M-H]-	0.0139799	1.96484	0.0188915	1.66494	0.447249	0.299896	lipid	-	0.142268	0.144621	0.0751424	0.0996591	0.0424554	0.517191	0.186389	0.456884	0.403841	0.265001	0.201363	0.456138	0.356051	0.291703	0.293397
M116T209_2	3.479	116.07	Proline	[M+H]+	0.00448458	-1.22128	0.0118773	-0.984772	0.156084	-0.236505	HMDB0000162	C00148	170.153	213.276	247.714	166.343	220.245	92.0965	77.9138	105.234	92.1488	94.246	99.1083	107.958	106.762	104.608	95.8286
M243T143	2.39	243.062	Pseudouridine	[M-H]-	0.32725	0.111013	0.0296461	0.362969	0.112843	-0.251956	HMDB0000767	C02067	8.66926	8.75643	9.05354	7.44673	8.46495	9.69633	8.26954	11.1428	9.0198	8.86707	10.1445	12.1054	10.1617	12.4585	9.64756
M168T67	1.114	168.065	Pyridoxal	[M+H]+	0.0120283	1.07602	0.000258643	1.18451	0.679985	-0.108491	HMDB0001545	C00250	0.854438	0.907649	0.976634	0.742035	0.87208	2.01895	1.30454	1.91212	1.93377	2.00136	1.78971	2.12889	2.13168	1.97567	1.86743
M169T194	3.229	169.097	Pyridoxamine	[M+H]+	0.0390429	1.83443	0.0219853	2.58647	0.235986	-0.752038	HMDB0001431	C00534	0.0943159	0.125264	0.192334	0.0783293	0.0446926	0.654512	0.280604	0.0930892	0.274738	0.529752	1.03586	0.365743	0.500848	0.586947	0.72356
M128T222	3.701	128.035	Pyroglutamic acid	[M-H]-	0.0342958	-0.578969	0.0229474	0.63073	0.00760385	-1.2097	HMDB0000267	C01879	48.3844	49.212	39.0421	43.5045	30.1201	28.5668	23.1331	35.4725	31.3252	32.5651	50.9488	73.8737	73.3425	70.3569	57.0386
M377T70	1.163	377.143	Riboflavin	[M+H]+	0.000774421	1.87777	0.00577136	1.99919	0.633881	-0.121418	HMDB0000244	C00255	0.02625	0.0278566	0.0222599	0.0210624	0.0211716	0.0772797	0.0726992	0.111243	0.0928853	0.0885511	0.0727351	0.119543	0.0981668	0.103938	0.0797524
M399T567	9.452	399.143	S-Adenosylmethionine	[M+H]+	0.0200096	-3.03523	0.0399621	-1.71291	0.0297136	-1.32233	HMDB0001185	C00019	0.425542	0.582415	0.403706	0.178399	0.653264	0.0623652	0.0305677	0.0753296	0.0897875	0.057327	0.101038	0.16839	0.158124	0.152573	0.10419
M106T384	6.399	106.05	Serine	[M+H]+	0.0097976	0.336558	0.00333674	0.291981	0.679985	0.0445768	HMDB0062263	C00716	0.884344	0.868694	0.944048	0.881207	0.995189	1.22005	1.07688	1.02353	1.24144	1.30439	1.06404	1.20659	1.1448	1.0957	1.08828
M676T35	0.582	675.539	SM 32:1;2O|SM 18:1;2O/14:0	[M+H]+	0.0263905	-1.54765	0.0358901	-1.58919	0.956762	0.0415386	lipid	-	1.97051	1.16737	1.07345	2.10921	0.967174	0.48819	1.05114	0.542458	0.456959	0.213942	0.460873	0.531118	0.490706	0.469053	0.470376
M702T34	0.574	701.556	SM 34:2;2O|SM 18:1;2O/16:1	[M+H]+	0.128993	-0.615733	0.0318417	-0.860046	0.675456	0.244313	lipid	-	4.20012	2.93728	2.83327	4.60406	2.85948	2.74536	4.18727	2.2784	2.61759	0.910856	1.74507	2.175	1.99791	1.79527	1.89187
M283T47	0.783	283.263	Stearic acid	[M-H]-	0.0800701	-0.378827	0.0258383	-0.64238	0.181764	0.263553	HMDB0000827	C01530	6.05054	4.1929	5.26063	3.8768	4.74865	3.69443	3.45357	3.38727	3.97375	3.60419	3.92602	2.39822	3.25171	2.51918	3.36358
M428T35	0.59	428.372	Stearoylcarnitine	[M+H]+	0.020256	3.95341	0.00378693	3.8064	0.807364	0.147012	HMDB0000848	-	0.119332	0.38642	0.22854	0.15138	0.164294	3.67855	5.77625	3.53101	4.06211	1.66968	3.76276	2.12091	2.77839	2.76874	3.25899
M117T421	7.012	117.019	Succinic acid	[M-H]-	0.0223372	0.456918	0.0151507	0.577912	0.130592	-0.120995	HMDB0000254	C00042	24.1024	33.5299	25.1101	22.1361	21.7823	37.7055	29.8433	35.2417	35.4171	37.077	36.362	38.1577	39.8956	38.6821	35.9677
M341T291	4.856	341.109	Sucrose	[M-H]-	0.280485	0.399662	0.0055191	1.18407	0.0230401	-0.784411	HMDB0000258	C00089	0.201743	0.378542	0.392253	0.194071	0.350006	0.296635	0.403767	0.382245	0.469772	0.61875	0.673002	0.66105	0.683521	0.728298	0.700141
M126T303	5.048	126.022	Taurine	[M+H]+	0.0120283	0.28851	0.00330213	0.337857	0.589636	-0.049347	HMDB0000251	C00245	11.406	12.5709	10.8519	10.709	10.5207	15.6359	12.1014	12.9331	14.3992	14.0869	13.947	14.2802	14.9232	13.8444	13.8563
M223T34	0.566	223.17	Tetradec-5-ynoic acid	[M-H]-	0.0132832	2.34049	2.01144e-05	2.4088	0.830148	-0.0683144	-	-	0.0946814	0.181336	0.128618	0.171657	0.144375	0.555503	0.521861	1.22321	0.759404	0.733556	0.736389	0.775303	0.74908	0.774751	0.791467
M265T162	2.708	265.11	Thiamine	[M]+	0.000427142	2.48584	0.0290779	1.57197	0.0300309	0.913871	HMDB0000235	C00378	0.652551	1.0724	0.952052	0.708168	0.937293	4.97609	3.43023	4.95406	4.79318	5.46834	1.3543	3.70993	3.07166	2.53841	2.17682
M135T272	4.53	135.03	Threonic acid	[M-H]-	0.0148937	-2.73934	0.0258383	-2.36898	0.135083	-0.370363	HMDB0000943	C01620	36.6756	33.3012	35.1194	33.8015	48.0156	6.16983	2.72099	5.68599	6.47734	7.28444	5.94252	8.19563	7.21823	7.86415	6.96267
M138T176	2.94	138.055	Trigonelline	[M+H]+	0.0935125	0.352091	0.0108086	0.527246	0.335699	-0.175156	HMDB0000875	C01004	15.9655	14.7925	21.4335	15.3653	16.6366	26.1433	14.8681	18.6022	23.0688	25.6919	25.3238	23.3083	24.3177	24.6971	23.6906
M76T240	3.992	76.0756	Trimethylamine N-oxide	[M+H]+	0.028069	0.416317	0.000726716	1.00288	0.00168633	-0.586563	HMDB0000925	C01104	5.05394	4.70326	6.7653	5.32233	4.16213	6.87887	5.6584	6.83541	7.08832	8.09535	10.6813	10.8237	11.0205	9.74077	9.85164
M205T160	2.666	205.096	Tryptophan	[M+H]+	0.000173592	1.04366	0.0260405	0.825344	0.360315	0.218318	HMDB0000929	C00078	1.38468	1.58061	1.27701	1.21933	1.77667	3.09481	2.97591	3.41657	2.92973	2.92721	1.81285	3.21369	3.08704	2.51918	2.1932
M565T468	7.798	565.047	UDP-D-glucose	[M-H]-	0.0305656	-2.96275	0.0493843	-2.07338	0.0949603	-0.889375	HMDB0000286	C00029	0.547223	0.334693	0.536123	0.513817	1.06081	0.0795855	0.00141199	0.139031	0.0674315	0.141607	0.112245	0.159342	0.148595	0.146327	0.144556
M579T534	8.899	579.026	UDP-D-Glucuronic acid	[M-H]-	0.0148937	-4.76539	0.0258383	-3.098	0.447249	-1.66739	HMDB0000935	C00167	0.0141445	0.0109716	0.0092175	0.0115262	0.0731444	0	0	0.00225612	0	0.0029946	0.00216294	0	0.0024181	0.0048517	0.00446589
M111T60_1	1.007	111.02	Uracil	[M-H]-	0.000775854	2.08192	0.000157448	1.98758	0.483348	0.0943364	HMDB0000300	C00106	14.5791	17.2167	11.5556	13.3681	13.8357	59.575	54.82	74.262	61.8485	58.8152	51.2577	62.117	56.8137	56.4941	53.1196
M61T97	1.621	61.0397	Urea	[M+H]+	0.00369582	0.712545	0.000175174	1.01849	0.0531546	-0.305944	HMDB0000294	C00086	5.34478	4.53935	4.41695	5.12084	4.56895	7.14412	6.66557	8.36617	7.53469	7.62136	10.0702	8.75501	9.61832	10.5078	9.6493
M606T435	7.248	606.073	Uridine 5'-diphospho-N-acetylglucosamine	[M-H]-	0.161807	-0.552032	0.0494459	-0.472954	0.871633	-0.079078	HMDB0000290	C00043	0.382687	0.304149	0.368138	0.311543	0.463527	0.262295	0.106235	0.467761	0.245452	0.309957	0.228786	0.270544	0.246853	0.297006	0.275336
M160T107	1.79	160.133	Valine betaine	[M+H]+	0.020256	0.551563	1.6424e-05	1.33398	0.0054757	-0.782415	HMDB0240571	-	0.167386	0.168181	0.160887	0.142303	0.126456	0.248993	0.183121	0.21917	0.25671	0.273957	0.367034	0.392526	0.400955	0.370173	0.398391
M151T122_1	2.028	151.026	Xanthine	[M-H]-	0.00413915	0.551132	0.0135622	0.450921	0.204129	0.100211	HMDB0000292	C00385	130.986	154.089	128.199	141.61	104.251	183.85	178.732	213.186	191.342	180.323	167.129	180.318	182.425	187.276	183.832
M151T166	2.768	151.061	Xylitol	[M-H]-	0.000138568	1.28654	0.000161851	0.951223	0.0157363	0.335319	HMDB0002917	C00379	7.76996	8.28751	7.95032	7.02628	6.10334	20.0097	15.4785	18.4629	18.6186	19.2548	13.6288	15.1802	13.8074	15.3647	13.8246

## Sheet: con vs DM
name	rt(min)	m/z	Metabolite name	Adduct type	con vs DM		HMDB	KEGG	con					DM
					pvalue	Log2FC(DM/con)			con1	con2	con3	con4	con5	DM1	DM2	DM3	DM4	DM5
M111T59	0.986	111.055	1-Acetylimidazole	[M+H]+	0.013718	0.948549	HMDB0243814	C02560	3.91618	4.19771	2.364	3.76234	1.19313	6.10698	5.30964	6.48386	5.35504	6.16794
M100T168	2.793	100.04	1-Aminocyclopropane-1-carboxylate	[M-H]-	0.0148937	1.49356	HMDB0036458	C01234	0.534601	0.854842	0.648756	0.500083	0.506695	1.664	1.86792	1.65353	1.68421	1.65599
M102T90	1.503	102.127	1-Hexylamine	[M+H]+	0.000289857	2.86402	HMDB0032323	C08306	9.21146	6.6121	9.34378	9.53369	8.00303	56.6806	61.844	76.0633	52.39	60.4889
M168T317	5.281	168.078	1-Methylhistidine	[M-H]-	0.0148937	-0.997119	HMDB0000001	C01152	2.35066	3.26966	2.37132	2.04028	2.76307	1.16052	1.163	1.80601	1.09895	1.24491
M131T74	1.24	131.071	2-Hydroxy-4-methylpentanoic acid	[M-H]-	0.00700563	-0.879678	HMDB0000665	-	3.72758	4.82551	5.0152	3.65694	3.85628	2.44383	2.17917	2.80661	2.8098	2.45048
M129T443	7.379	129.019	2-Hydroxyglutaric acid	[M-H]-	0.00594661	-2.21787	HMDB0000694	C03196	4.05638	4.61371	4.78589	2.90906	5.16115	0.903447	0.553061	1.1507	0.897984	0.953827
M117T99	1.654	117.056	2-Hydroxyvaleric acid	[M-H]-	0.00139421	-0.987237	HMDB0001863	-	10.9326	12.8411	10.9326	11.0937	9.9335	6.25872	4.07765	6.50354	6.14678	7.21495
M145T429	7.144	145.014	2-Ketoglutaric acid	[M-H]-	0.00606821	-2.09106	HMDB0000208	C00026	3.95228	4.737	4.41238	3.11307	5.61312	1.11088	0.578013	1.42288	1.0354	1.22781
M207T56	0.925	207.012	2-Naphthalenesulfonic acid	[M-H]-	0.0429956	0.979356	HMDB0255446	C16202	0.593144	0.596409	0.768963	0.444411	0.471181	1.03551	1.71582	1.2389	1.23282	1.12802
M258T154	2.567	258.108	2'-O-Methylcytidine	[M+H]+	0.0176938	-1.77437	HMDB0242132	-	0.722688	1.42678	1.05237	0.659774	0.90361	0.274873	0.227469	0.404536	0.292189	0.256317
M188T95	1.578	188.072	3-Indolepropionic acid	[M-H]-	0.000206396	2.51836	HMDB0002302	-	0.0874251	0.179795	0.0954115	0.058986	0.0906073	0.553527	0.435842	0.665804	0.601341	0.619618
M258T122	2.035	258.108	3-Methylcytidine	[M+H]+	0.0152749	0.354671	HMDB0240577	-	0.22344	0.180982	0.239814	0.222703	0.192264	0.290857	0.242601	0.301156	0.27646	0.288826
M150T67	1.113	150.054	4-Hydroxymandelonitrile	[M+H]+	0.0120283	1.0696	HMDB0060318	C03742	0.864455	0.922456	0.95892	0.865249	0.955633	2.01531	1.36951	2.05285	1.92036	2.10508
M181T152	2.538	181.051	4-Hydroxyphenyllactic acid	[M-H]-	0.00515214	-0.989073	HMDB0000755	C03672	0.467565	0.538916	0.468486	0.428741	0.536321	0.306282	0.223636	0.241546	0.294228	0.331737
M138T36	0.602	138.02	4-Nitrophenol	[M-H]-	0.0247719	1.23435	HMDB0001232	C00870	0.928732	0.784006	0.911738	0.829487	0.778609	1.54914	2.65439	1.53713	2.62037	2.49811
M268T76_2	1.274	268.103	Adenosine	[M+H]+	0.015885	-1.09358	HMDB0000050	C00212	78.2272	103.694	131.168	72.0264	121.587	59.7718	36.7481	47.4103	59.2813	57.7108
M157T162	2.708	157.036	Allantoin	[M-H]-	0.0244064	0.32202	HMDB0000462	C01551	5.29503	5.23715	5.66094	5.05077	3.95612	6.33763	5.9711	6.20945	6.56023	5.9809
M448T36	0.601	448.34	Arachidonoylcarnitine	[M+H]+	0.020256	1.85637	HMDB0006455	-	0.0793102	0.286869	0.144122	0.00818256	0.106983	0.547642	0.556721	0.639954	0.571483	0.249948
M456T34	0.574	456.403	Arachidoylcarnitine	[M+H]+	0.0120283	6.64137	HMDB0006460	-	0	0.0093384	0	0	0.000766746	0.244282	0.363663	0.230815	0.22603	0.11038
M175T599_1	9.989	175.118	Arginine	[M+H]+	0.00876873	-0.815662	HMDB0000517	C00062	186.18	166.89	131.29	160.693	176.628	108.949	127.763	32.8366	94.2106	105.59
M131T327	5.452	131.046	Asparagine	[M-H]-	0.00631176	-2.40067	HMDB0000168	C00152	5.76328	7.52435	7.68591	5.03716	8.44126	1.07658	1.26898	1.70141	1.06814	1.36994
M132T406	6.762	132.03	Aspartic acid	[M-H]-	0.030407	0.75881	HMDB0000191	C00049	3.99014	4.60195	3.47027	3.34746	4.09464	8.27481	3.78051	7.22328	7.58877	7.64269
M664T532	8.867	664.112	beta-Nicotinamide adenine dinucleotide	[M+H]+	0.00133456	-1.49502	HMDB0000902	C00003	0.233506	0.185151	0.241386	0.229935	0.275915	0.0846539	0.0333452	0.162824	0.0717674	0.0929705
M335T575	9.588	335.062	beta-Nicotinamide mononucleotide	[M+H]+	0.00339527	-3.87364	HMDB0000229	C00455	0.161293	0.170479	0.189115	0.142827	0.246899	0.0178534	0.00580208	0.00607186	0.0130119	0.0259125
M162T284_2	4.727	162.112	Carnitine	[M+H]+	0.000121572	-1.25201	HMDB0000062	C00318	1727.87	1628.65	1459.93	1736.05	1578.97	617.849	822.657	727.398	627.728	658.912
M407T73	1.212	407.28	Cholic acid	[M-H]-	0.0148937	3.07019	HMDB0000619	C00695	0.206935	0.466273	0.219922	0.302377	0.204571	2.78911	1.64579	2.92689	2.75743	2.73462
M191T543	9.05	191.02	Citric acid	[M-H]-	0.00363293	-1.58512	HMDB0000094	C00158	4.55549	4.23594	3.40976	3.86177	3.18743	1.47191	1.1885	1.07548	1.1419	1.3819
M176T431	7.186	176.103	Citrulline	[M+H]+	0.0349255	-0.488121	HMDB0000904	C00327	3.36042	4.03905	3.73342	2.6219	4.33602	2.50521	2.46171	2.9508	2.4373	2.65634
M114T92	1.541	114.066	Creatinine	[M+H]+	0.000289857	0.623297	HMDB0000562	C00791	96.7825	92.5225	88.2649	93.9905	85.9733	145.345	141.731	132.09	148.934	151.821
M112T87	1.444	112.05	Cytosine	[M+H]+	0.0120283	1.83169	HMDB0000630	C00380	0.149264	0.154065	0.14866	0.149065	0.122128	0.546433	0.408332	0.641635	0.611718	0.523911
M146T340_1	5.674	146.117	Deoxycarnitine	[M+H]+	0.0120283	-1.26674	HMDB0001161	C01181	38.7595	42.073	45.021	36.7721	73.8912	19.326	20.0206	21.1942	18.7954	19.2991
M391T50	0.831	391.285	Deoxycholic acid	[M-H]-	0.0134615	2.50207	HMDB0000626	C04483	0.00953335	0.0569079	0.0336507	0.0172348	0.106333	0.244191	0.130207	0.436587	0.221744	0.258083
M228T117	1.954	228.097	Deoxycytidine	[M+H]+	0.0387605	0.342172	HMDB0000014	C00881	2.41781	1.83196	2.04905	2.2515	2.11745	3.01565	2.01099	2.72065	3.06529	2.98115
M193T400	6.673	193.035	D-Glucuronic acid	[M-H]-	0.0148937	0.804902	HMDB0000127	C00191	4.67302	4.77271	3.75383	3.59443	4.43524	8.23258	5.21693	7.21487	8.22555	7.75057
M307T31	0.513	307.264	Dihomolinoleic acid	[M-H]-	0.0469854	-4.3547	HMDB0061864	-	28.187	10.6053	16.9106	24.7542	50.2389	1.07597	1.49111	2.28802	1.5166	0.836173
M143T238_1	3.974	143.081	Ectoine	[M+H]+	0.00179186	-1.65751	HMDB0240650	C06231	16.5715	12.7313	16.2869	14.616	19.1018	4.97429	4.01817	6.70519	4.50182	5.28163
M309T31	0.509	309.279	Eicosenoic acid	[M-H]-	0.0319481	-4.71791	HMDB0002231	C16526	12.3641	4.9865	7.37224	13.4222	19.8714	0.373659	0.623288	0.66254	0.446678	0.347749
M230T282	4.696	230.095	Ergothioneine	[M+H]+	0.000390399	3.07654	HMDB0003045	C05570	0.402942	0.219594	0.0655612	0.02172	0.318761	1.49683	1.31645	2.13828	1.60742	1.69131
M259T475	7.917	259.022	Fructose-6-phosphate	[M-H]-	0.0148937	-4.51697	HMDB0000124	C00085	0.527238	0.10663	0.104397	0.601399	0.556415	0.0337107	0.00204719	0.00677639	0.0251404	0.0288498
M115T476	7.936	115.004	Fumaric acid	[M-H]-	0.0148937	-1.15662	HMDB0000134	C00122	3.8663	4.74346	3.05346	3.12184	5.93988	1.9277	1.53036	1.91416	1.99129	1.94391
M276T561	9.358	276.118	gamma-Glutamylglutamine	[M+H]+	0.020256	-0.755613	HMDB0011738	C05283	0.695547	0.701416	0.738686	0.531158	0.466506	0.372808	0.322428	0.319022	0.332961	0.37452
M195T317	5.287	195.051	Gluconate	[M-H]-	0.00645486	-1.55543	HMDB0000625	C00257	26.254	22.7365	28.0117	22.7121	36.7319	11.0599	3.58002	9.49846	11.4975	11.5427
M179T327	5.448	179.056	Glucose	[M-H]-	0.0148937	0.949324	HMDB0000122	C00221	11.3796	11.6765	10.5534	11.1096	7.22375	20.2211	18.859	18.8603	20.7034	21.5964
M259T508	8.47	259.022	Glucose-6-phosphate	[M-H]-	0.0148937	-5.02994	HMDB0001401	C00092	0.357287	0.0913121	0.09805	0.330308	0.421555	0.00810974	0.00146875	0.00622917	0.0053918	0.0241287
M146T397_2	6.614	146.046	Glutamic acid	[M-H]-	0.0436137	-0.333327	HMDB0000148	C00025	190.306	218.407	219.974	169.017	193.543	162.217	125.24	201.381	155.817	163.478
M147T362_1	6.039	147.076	Glutamine	[M+H]+	0.00250851	-1.84854	HMDB0000641	C00064	54.2454	60.6694	69.9496	52.3035	75.737	15.6986	19.5442	15.4996	14.4249	17.0779
M274T434	7.227	274.104	Glutamylglutamine	[M-H]-	0.0148937	-1.05928	HMDB0028817	-	2.35958	2.55676	3.05189	1.61992	1.68611	1.00107	0.935896	1.01988	0.948294	1.06732
M171T439	7.317	171.006	Glycerol-3-phosphate	[M-H]-	0.0148937	-5.60579	HMDB0000126	C00093	1.23129	0.821737	0.830045	1.15511	4.85843	0.00517687	0.00120744	0.00665632	0.00779971	0.183071
M284T172	2.861	284.098	Guanosine	[M+H]+	0.00324306	1.36032	HMDB0000133	C00387	0.188822	0.325834	0.307545	0.139038	0.321268	0.784466	0.528582	0.44912	0.632017	0.729868
M274T59	0.982	274.201	Heptanoylcarnitine	[M+H]+	0.0120283	-1.21338	HMDB0013238	-	0.0949911	0.0856734	0.0896889	0.0857024	0.128072	0.0373157	0.0246899	0.0849994	0.0293695	0.0410702
M112T245	4.082	112.087	Histamine	[M+H]+	0.00181235	1.61866	HMDB0000870	C00388	5.10902	8.47753	5.30215	7.24842	2.3557	17.8804	17.5965	17.6166	16.7428	16.7903
M154T522	8.696	154.062	Histidine	[M-H]-	0.0148937	-1.92269	HMDB0000177	C00135	0.766768	0.562313	0.641791	0.62583	1.59659	0.26651	0.240939	0.19964	0.211065	0.223871
M132T246	4.101	132.065	Hydroxyproline	[M+H]+	0.0409013	0.54304	HMDB0000725	C01157	0.354043	0.268753	0.226988	0.19042	0.176412	0.401558	0.355422	0.326583	0.370227	0.378839
M110T320	5.334	110.027	Hypotaurine	[M+H]+	0.0120283	-0.562234	HMDB0000965	C00519	1.11675	1.64762	1.45031	1.07755	1.40677	0.992652	0.820469	0.816547	1.01247	0.97698
M132T153	2.557	132.102	Isoleucine	[M+H]+	0.0120283	0.697797	HMDB0000172	C00407	8.76817	13.105	9.87188	9.01297	9.17663	15.2603	16.4122	18.2467	17.1871	16.9115
M132T141	2.344	132.102	Leucine	[M+H]+	0.00207496	0.563533	HMDB0000687	C00123	15.8816	19.6667	19.092	15.4416	19.7299	25.2817	26.6509	31.0565	25.6605	27.7737
M424T37	0.61	424.341	Linoleoylcarnitine	[M+H]+	0.045583	1.42469	HMDB0240780	-	0.436495	0.512319	0.336665	0.377931	0.33646	1.12776	1.36332	1.65797	1.38741	0.611046
M512T40	0.668	512.299	LPC 14:0	[M+FA-H]-	0.0355871	-2.25002	-	-	2.68169	1.02974	1.45125	2.7378	3.45725	0.342253	0.834364	0.71847	0.445208	0.326181
M526T40	0.664	526.315	LPC 15:0	[M+FA-H]-	0.0402237	-2.24974	-	-	5.00143	1.67753	2.69266	5.48021	2.82352	0.69955	1.11802	1.01698	0.776466	0.569511
M540T39	0.657	540.329	LPC 16:0	[M+FA-H]-	0.0148937	-1.13358	-	-	37.6599	24.2474	27.5442	41.4447	42.1382	15.2475	25.5168	19.5481	18.7284	10.4475
M538T40	0.663	538.313	LPC 16:1	[M+FA-H]-	0.0148937	-2.11498	-	-	7.525	3.51754	4.84462	7.78385	8.2132	1.07124	2.59826	2.26336	1.30542	0.984074
M566T39	0.652	566.345	LPC 18:1	[M+FA-H]-	0.0203901	-2.63362	-	-	27.2339	12.7481	18.3187	30.6964	35.8918	3.36985	6.19953	6.26691	4.42506	2.34299
M594T38	0.632	594.378	LPC 20:1	[M+FA-H]-	0.0364234	-3.05576	-	-	0.748823	0.399338	0.670774	0.803131	1.46917	0.0888078	0.127114	0.130035	0.14872	0.0697215
M588T39	0.65	588.331	LPC 20:4	[M+FA-H]-	0.0186988	1.33048	-	-	0.680995	0.62165	0.447601	0.452656	0.369125	1.23027	1.7079	1.83544	1.15957	0.615872
M480T40	0.663	480.307	LPE 18:1	[M+H]+	0.00983348	-1.66882	-	-	17.849	10.6925	13.7173	17.6082	22.358	5.70287	5.86206	7.80456	7.31245	2.53366
M506T40	0.66	506.324	LPE 20:1	[M-H]-	0.0162503	-3.02555	-	-	2.26682	1.19187	1.99205	2.33063	3.4207	0.266645	0.350352	0.481379	0.305513	0.146166
M436T40	0.668	436.283	LPE O-16:1	[M-H]-	0.0193198	-1.28182	-	-	18.9188	9.20797	10.8972	14.0076	16.655	5.29668	6.92552	10.4382	5.90217	3.60717
M462T40	0.662	462.299	LPE O-18:2	[M-H]-	0.0148937	-2.87413	-	-	90.0624	43.2025	53.1255	50.7053	86.3221	7.78287	8.22082	19.5303	8.37002	5.18308
M490T39	0.65	490.33	LPE O-20:2	[M-H]-	0.0148937	-3.80199	-	-	1.11297	0.434343	0.537829	0.816877	0.917541	0.0433981	0.0321937	0.156157	0.049718	0.0293032
M509T40	0.661	509.288	LPG 18:1	[M-H]-	0.0148937	-2.25706	-	-	0.813068	1.06736	1.17433	0.764846	1.60172	0.280203	0.228329	0.0279952	0.374196	0.255401
M597T41	0.684	597.303	LPI 18:1	[M-H]-	0.042123	-4.72773	-	-	1.73555	0.320499	0.672892	1.74271	1.80933	0.0367085	0.0490258	0.0941835	0.0464369	0.0311033
M510T59	0.981	510.284	LPS 17:0	[M-H]-	0.047935	-6.11062	-	-	0.705407	0.126546	0.274415	0.84487	0.503699	0	0.0155738	0.00881645	0.00321579	0.00898505
M524T58	0.971	524.299	LPS 18:0	[M-H]-	0.047935	-3.98742	-	-	12.8057	2.76035	4.13028	13.825	10.7415	0.627062	0.461556	0.948131	0.621135	0.412864
M522T59	0.985	522.284	LPS 18:1	[M-H]-	0.0409009	-5.73776	-	-	8.57096	2.54099	3.73865	8.41237	12.5699	0.128431	0.103402	0.260213	0.142242	0.0985084
M550T57	0.954	550.313	LPS 20:1	[M-H]-	0.0398544	-8.8463	-	-	1.18168	0.26052	0.437041	1.2299	1.37491	0.00261781	0.0035489	0	0.00251045	0
M544T60	0.993	544.265	LPS 20:4	[M-H]-	0.037424	-2.20752	-	-	0.682594	0.25612	0.348626	0.615489	0.841205	0.105437	0.0810467	0.20542	0.121469	0.0825244
M147T605	10.087	147.112	Lysine	[M+H]+	0.00683268	-0.789583	HMDB0000182	C00047	40.1711	35.9516	37.4705	38.9695	51.7852	26.1185	20.9126	23.3205	26.9253	27.6598
M133T500	8.338	133.014	Malic acid	[M-H]-	0.00568721	-2.30187	HMDB0000744	C03668	26.1698	20.5941	20.8891	16.6127	30.6891	7.69859	1.49262	3.38325	6.10269	7.19295
M161T387	6.455	161.046	Meglutol	[M-H]-	0.040106	-1.78478	HMDB0000355	C03761	1.85922	4.1131	2.50268	1.49933	2.21431	0.577414	0.386252	0.912957	0.893416	0.751593
M227T33	0.549	227.201	Myristic acid	[M-H]-	0.0217863	-1.03418	HMDB0000806	C06424	3.80841	2.98994	3.01495	4.54963	5.24701	1.72682	1.96456	2.72714	1.85875	1.64646
M225T33	0.555	225.185	Myristoleic acid	[M-H]-	0.0148937	0.963864	HMDB0002000	C08322	0.339981	0.444924	0.378147	0.370813	0.407068	0.523072	0.683368	1.31586	0.6751	0.761045
M372T38	0.635	372.31	Myristoylcarnitine	[M+H]+	0.0356434	1.3134	HMDB0005066	-	0.240676	0.39334	0.263836	0.201133	0.175096	0.696183	1.02004	0.678765	0.760558	0.384311
M189T591	9.857	189.159	N6,N6,N6-Trimethyl-L-lysine	[M+H]+	7.73007e-05	0.971207	HMDB0001325	C03793	6.1942	6.4629	5.2441	5.07863	6.06708	11.5762	11.277	11.4606	12.2022	11.9536
M303T525	8.745	303.084	N-Acetylaspartylglutamic acid	[M-H]-	0.0398544	-4.4815	HMDB0001067	C12270	0.042354	1.23402	0.431155	0.0431216	0.145753	0.00510953	0.0055874	0.0078872	0.00619855	0.0120441
M220T166	2.768	220.083	N-Acetylglucosamine	[M-H]-	0.00167714	1.8148	HMDB0000215	C00140	1.12537	1.94037	1.31608	0.95851	0.39889	3.94625	3.83867	3.89874	4.14656	3.87302
M220T149	2.491	220.083	N-Acetylmannosamine	[M-H]-	7.28058e-06	2.82186	HMDB0001129	C00645	0.544877	0.923184	0.744993	0.503559	0.411348	4.05019	4.87853	4.10239	4.55346	4.23686
M308T337	5.614	308.099	N-Acetylneuraminic acid	[M-H]-	0.00825863	0.940514	HMDB0000230	C19910	0.447015	0.472411	0.422301	0.399209	0.430473	0.775223	0.602227	0.930326	0.812628	0.815997
M206T78	1.306	206.082	N-Acetylphenylalanine	[M-H]-	0.0228325	-0.755704	HMDB0000512	C03519	0.378868	0.296959	0.393029	0.370948	0.513031	0.249322	0.176755	0.249625	0.219295	0.254162
M146T226	3.772	146.046	N-Acetylserine	[M-H]-	0.0259364	0.856861	HMDB0002931	-	0.720072	0.653742	0.650832	0.589684	0.501305	1.27136	0.730403	1.12189	1.40844	1.45833
M163T756	12.6	163.123	Nicotine	[M+H]+	0.000602123	1.11874	HMDB0014330	C16150	0.223931	0.226917	0.236569	0.245337	0.192624	0.420609	0.524592	0.505625	0.454598	0.445947
M158T98	1.634	158.082	N-Isovalerylglycine	[M-H]-	0.00391074	1.95803	HMDB0000678	-	0.322102	0.474356	0.453365	0.398499	0.311153	1.85337	1.4336	1.76728	1.32175	0.970908
M154T66	1.099	154.097	N-omega-Acetylhistamine	[M+H]+	0.0120283	1.18732	HMDB0013253	C05135	0.287951	0.250294	0.238699	0.294357	0.318275	0.697219	0.671232	0.641624	0.723297	0.73358
M286T56	0.94	286.2	Octenoylcarnitine	[M+H]+	0.0120283	-1.73254	-	-	0.312584	0.315106	0.239965	0.329082	0.514571	0.0966853	0.151022	0.0915727	0.0850241	0.0946373
M281T31_1	0.522	281.248	Oleic acid	[M-H]-	0.0215351	-3.37522	HMDB0000207	C00712	293.831	157.724	199.033	310.388	450.659	23.0692	36.1877	45.2739	28.8801	17.7804
M140T491	8.187	140.012	O-Phosphoethanolamine	[M-H]-	0.0148937	-7.1671	HMDB0000224	C00346	2.29801	0.90664	1.57688	2.29627	7.33745	0.0016982	0.00130311	0.00465899	0.00217057	0.108094
M613T598	9.969	613.157	Oxidized glutathione	[M+H]+	0.0120283	-5.42818	HMDB0003337	C00127	0.220892	0.171048	0.139002	0.156505	0.652774	0.00544686	0	0	0.00725965	0.0144954
M255T32	0.53	255.232	Palmitic acid	[M-H]-	0.0111372	-1.07734	HMDB0000220	C00249	55.4555	40.6	39.2589	60.4306	59.7767	22.8977	31.7727	31.4085	25.4043	18.0344
M253T32	0.536	253.217	Palmitoleic acid	[M-H]-	0.0174815	-1.89312	HMDB0003229	C08362	29.9974	20.8537	23.7755	31.709	45.7295	6.44839	8.30796	13.5041	7.93726	7.2366
M400T37	0.61	400.341	Palmitoylcarnitine	[M+H]+	0.0271534	2.66181	HMDB0000222	C02990	0.750356	0.893878	0.733092	0.655059	0.606492	5.0078	8.40745	4.76499	5.68933	2.34569
M218T173	2.875	218.103	Pantothenic acid	[M-H]-	0.00590297	-1.77548	HMDB0000210	C00864	11.5029	11.3708	12.0257	10.0261	15.5834	3.52383	3.15724	3.58705	3.58512	3.94285
M803T32	0.534	802.565	PC 34:2|PC 16:0_18:2	[M+FA-H]-	0.00274508	1.59551	-	-	0.333505	0.652529	0.602076	0.400487	0.434351	1.79602	1.79728	1.48366	1.4912	1.09916
M757T32	0.528	756.551	PC 34:3|PC 16:0_18:3	[M+H]+	0.0120283	1.67502	-	-	0.410062	0.645991	0.563653	0.382375	0.532815	1.93251	2.03991	1.81359	2.02803	0.955429
M787T31	0.524	786.599	PC 36:2|PC 18:1_18:1	[M+H]+	0.0120283	-0.688791	-	-	8.80934	9.11299	9.11068	8.94342	9.47268	7.45597	6.48426	7.0948	6.92029	2.92608
M827T32	0.537	826.565	PC 36:4|PC 16:0_20:4	[M+FA-H]-	0.00102092	3.12985	-	-	0.0138422	0.34869	0.19695	0.133645	0.0364684	1.47427	1.61882	1.28367	1.37236	1.03734
M781T32	0.532	780.551	PC 36:5|PC 16:1_20:4	[M+Na]+	0.00101134	2.06142	-	-	0.406993	0.603909	0.448236	0.361811	0.486441	2.26976	1.87009	2.07769	2.30249	1.42849
M811T31	0.515	810.598	PC 38:4|PC 18:0_20:4	[M+H]+	0.0120283	2.43443	-	-	1.29353	1.57726	1.13148	1.03695	0.647647	8.4129	7.12071	6.97027	7.96525	3.15992
M809T31	0.521	808.582	PC 38:5|PC 18:1_20:4	[M+H]+	0.0178006	1.40221	-	-	1.01402	1.63437	1.29596	0.743422	0.92103	3.8851	3.40869	3.35085	3.92977	1.6304
M807T31	0.515	806.563	PC 38:6|PC 18:2_20:4	[M+H]+	0.0119858	2.26528	-	-	0.309569	0.783612	0.385469	0.198027	0.229343	2.49697	1.89399	1.88653	2.69189	1.07087
M727T33	0.544	726.547	PE O-36:3|PE O-18:2_18:1	[M-H]-	0.0310271	-3.61994	-	-	0.414099	1.15142	0.708514	0.871492	0.334166	0.0402125	0.00689635	0.0845638	0.017129	0.0159226
M723T32	0.541	722.514	PE O-36:5|PE O-16:1_20:4	[M-H]-	0.00947018	3.05557	-	-	0.0857041	0.170888	0.0319782	0.0987027	0.00870261	0.822553	0.320546	0.816206	0.684749	0.401604
M751T32	0.54	750.55	PE O-38:5|PE O-18:1_20:4	[M-H]-	0.040106	1.58081	-	-	0.150575	0.22118	0.12526	0.108125	0.0396934	0.416921	0.188959	0.588382	0.291634	0.215315
M729T33	0.542	728.555	PE P-36:2|PE P-18:1_18:1	[M+H]+	0.0120283	-3.11319	-	-	0.538846	1.70692	0.786775	0.682321	0.602428	0.0880017	0.0561527	0.1224	0.0872846	0.0450615
M241T32	0.537	241.217	Pentadecanoic acid	[M-H]-	0.0150881	-1.88644	HMDB0000826	C16537	4.07945	2.31309	2.88094	5.09283	4.26108	0.837636	1.3629	1.34866	1.05042	0.840855
M774T29	0.481	773.539	PG 36:2|PG 18:1_18:1	[M-H]-	0.0148937	-4.39766	-	-	0.269807	0.255763	0.267596	0.192494	0.252485	0.00985353	0.00258516	0.0143008	0.0121852	0.00750038
M166T135	2.254	166.086	Phenylalanine	[M+H]+	0.0110944	0.500018	HMDB0000159	C00079	12.145	14.7008	12.7995	12.1734	13.9986	19.7358	15.411	22.3283	17.9032	20.3301
M184T598	9.969	184.073	Phosphocholine	[M]+	0.0120283	-5.41977	HMDB0001565	C00588	16.8439	11.7819	12.0579	16.7001	36.8032	0.817394	0.21712	0.193882	0.281035	0.915913
M212T579	9.658	212.043	Phosphocreatine	[M+H]+	0.0349255	-2.26227	HMDB0001511	C02305	0.443209	0.112365	0.0764857	0.439369	0.458675	0.0400101	0.00895364	0.0114259	0.0318619	0.253043
M97T485	8.091	96.9697	Phosphoric acid	[M-H]-	0.0118194	-4.53387	HMDB0002142	C00009	9.92344	7.05742	6.70135	9.22131	13.8513	0.575244	0.980016	0.0496186	0.571678	0.180439
M886T37	0.614	885.557	PI 38:4|PI 18:0_20:4	[M-H]-	0.0139799	1.96484	-	-	0.142268	0.144621	0.0751424	0.0996591	0.0424554	0.517191	0.186389	0.456884	0.403841	0.265001
M116T209_2	3.479	116.07	Proline	[M+H]+	0.00448458	-1.22128	HMDB0000162	C00148	170.153	213.276	247.714	166.343	220.245	92.0965	77.9138	105.234	92.1488	94.246
M168T67	1.114	168.065	Pyridoxal	[M+H]+	0.0120283	1.07602	HMDB0001545	C00250	0.854438	0.907649	0.976634	0.742035	0.87208	2.01895	1.30454	1.91212	1.93377	2.00136
M169T194	3.229	169.097	Pyridoxamine	[M+H]+	0.0390429	1.83443	HMDB0001431	C00534	0.0943159	0.125264	0.192334	0.0783293	0.0446926	0.654512	0.280604	0.0930892	0.274738	0.529752
M128T222	3.701	128.035	Pyroglutamic acid	[M-H]-	0.0342958	-0.578969	HMDB0000267	C01879	48.3844	49.212	39.0421	43.5045	30.1201	28.5668	23.1331	35.4725	31.3252	32.5651
M377T70	1.163	377.143	Riboflavin	[M+H]+	0.000774421	1.87777	HMDB0000244	C00255	0.02625	0.0278566	0.0222599	0.0210624	0.0211716	0.0772797	0.0726992	0.111243	0.0928853	0.0885511
M399T567	9.452	399.143	S-Adenosylmethionine	[M+H]+	0.0200096	-3.03523	HMDB0001185	C00019	0.425542	0.582415	0.403706	0.178399	0.653264	0.0623652	0.0305677	0.0753296	0.0897875	0.057327
M106T384	6.399	106.05	Serine	[M+H]+	0.0097976	0.336558	HMDB0062263	C00716	0.884344	0.868694	0.944048	0.881207	0.995189	1.22005	1.07688	1.02353	1.24144	1.30439
M676T35	0.582	675.539	SM 32:1;2O|SM 18:1;2O/14:0	[M+H]+	0.0263905	-1.54765	-	-	1.97051	1.16737	1.07345	2.10921	0.967174	0.48819	1.05114	0.542458	0.456959	0.213942
M428T35	0.59	428.372	Stearoylcarnitine	[M+H]+	0.020256	3.95341	HMDB0000848	-	0.119332	0.38642	0.22854	0.15138	0.164294	3.67855	5.77625	3.53101	4.06211	1.66968
M117T421	7.012	117.019	Succinic acid	[M-H]-	0.0223372	0.456918	HMDB0000254	C00042	24.1024	33.5299	25.1101	22.1361	21.7823	37.7055	29.8433	35.2417	35.4171	37.077
M126T303	5.048	126.022	Taurine	[M+H]+	0.0120283	0.28851	HMDB0000251	C00245	11.406	12.5709	10.8519	10.709	10.5207	15.6359	12.1014	12.9331	14.3992	14.0869
M223T34	0.566	223.17	Tetradec-5-ynoic acid	[M-H]-	0.0132832	2.34049	-	-	0.0946814	0.181336	0.128618	0.171657	0.144375	0.555503	0.521861	1.22321	0.759404	0.733556
M265T162	2.708	265.11	Thiamine	[M]+	0.000427142	2.48584	HMDB0000235	C00378	0.652551	1.0724	0.952052	0.708168	0.937293	4.97609	3.43023	4.95406	4.79318	5.46834
M135T272	4.53	135.03	Threonic acid	[M-H]-	0.0148937	-2.73934	HMDB0000943	C01620	36.6756	33.3012	35.1194	33.8015	48.0156	6.16983	2.72099	5.68599	6.47734	7.28444
M76T240	3.992	76.0756	Trimethylamine N-oxide	[M+H]+	0.028069	0.416317	HMDB0000925	C01104	5.05394	4.70326	6.7653	5.32233	4.16213	6.87887	5.6584	6.83541	7.08832	8.09535
M205T160	2.666	205.096	Tryptophan	[M+H]+	0.000173592	1.04366	HMDB0000929	C00078	1.38468	1.58061	1.27701	1.21933	1.77667	3.09481	2.97591	3.41657	2.92973	2.92721
M565T468	7.798	565.047	UDP-D-glucose	[M-H]-	0.0305656	-2.96275	HMDB0000286	C00029	0.547223	0.334693	0.536123	0.513817	1.06081	0.0795855	0.00141199	0.139031	0.0674315	0.141607
M579T534	8.899	579.026	UDP-D-Glucuronic acid	[M-H]-	0.0148937	-4.76539	HMDB0000935	C00167	0.0141445	0.0109716	0.0092175	0.0115262	0.0731444	0	0	0.00225612	0	0.0029946
M111T60_1	1.007	111.02	Uracil	[M-H]-	0.000775854	2.08192	HMDB0000300	C00106	14.5791	17.2167	11.5556	13.3681	13.8357	59.575	54.82	74.262	61.8485	58.8152
M61T97	1.621	61.0397	Urea	[M+H]+	0.00369582	0.712545	HMDB0000294	C00086	5.34478	4.53935	4.41695	5.12084	4.56895	7.14412	6.66557	8.36617	7.53469	7.62136
M160T107	1.79	160.133	Valine betaine	[M+H]+	0.020256	0.551563	HMDB0240571	-	0.167386	0.168181	0.160887	0.142303	0.126456	0.248993	0.183121	0.21917	0.25671	0.273957
M151T122_1	2.028	151.026	Xanthine	[M-H]-	0.00413915	0.551132	HMDB0000292	C00385	130.986	154.089	128.199	141.61	104.251	183.85	178.732	213.186	191.342	180.323
M151T166	2.768	151.061	Xylitol	[M-H]-	0.000138568	1.28654	HMDB0002917	C00379	7.76996	8.28751	7.95032	7.02628	6.10334	20.0097	15.4785	18.4629	18.6186	19.2548

## Sheet: con vs M
name	rt(min)	m/z	Metabolite name	Adduct type	con vs M		HMDB	KEGG	con					M
					pvalue	Log2FC(M/con)			con1	con2	con3	con4	con5	M1	M2	M3	M4	M5
M454T35	0.581	454.388	11-Eicosenoylcarnitine	[M+H]+	0.00849289	-0.893138	-	-	0.211737	0.208086	0.199168	0.211469	0.216303	0.150597	0.0868196	0.106705	0.082401	0.137099
M100T168	2.793	100.04	1-Aminocyclopropane-1-carboxylate	[M-H]-	0.00390496	1.57283	HMDB0036458	C01234	0.534601	0.854842	0.648756	0.500083	0.506695	2.2155	1.40441	1.59642	1.87957	1.96255
M102T90	1.503	102.127	1-Hexylamine	[M+H]+	0.00495717	3.64327	HMDB0032323	C08306	9.21146	6.6121	9.34378	9.53369	8.00303	71.8236	133.867	119.65	109.733	98.5118
M168T317	5.281	168.078	1-Methylhistidine	[M-H]-	0.0373443	-0.577778	HMDB0000001	C01152	2.35066	3.26966	2.37132	2.04028	2.76307	1.62491	1.97549	1.78655	1.63916	1.54646
M162T544	9.062	162.076	2-Aminoadipic acid	[M+H]+	0.0214204	0.467427	HMDB0000510	C00956	0.244743	0.273468	0.23118	0.175416	0.291248	0.296199	0.351523	0.35334	0.351901	0.328407
M131T74	1.24	131.071	2-Hydroxy-4-methylpentanoic acid	[M-H]-	0.0258383	-0.548292	HMDB0000665	-	3.72758	4.82551	5.0152	3.65694	3.85628	3.35191	2.50479	2.78752	2.7926	2.97934
M129T443	7.379	129.019	2-Hydroxyglutaric acid	[M-H]-	0.00834567	-2.04083	HMDB0000694	C03196	4.05638	4.61371	4.78589	2.90906	5.16115	0.956714	1.14956	1.08018	1.00067	1.04426
M117T99	1.654	117.056	2-Hydroxyvaleric acid	[M-H]-	0.0242865	-0.325669	HMDB0001863	-	10.9326	12.8411	10.9326	11.0937	9.9335	8.51832	9.17138	8.51407	9.71855	8.54905
M145T429	7.144	145.014	2-Ketoglutaric acid	[M-H]-	0.0118598	-1.6362	HMDB0000208	C00026	3.95228	4.737	4.41238	3.11307	5.61312	1.26599	1.55389	1.38856	1.39254	1.42108
M207T56	0.925	207.012	2-Naphthalenesulfonic acid	[M-H]-	0.0258383	0.786769	HMDB0255446	C16202	0.593144	0.596409	0.768963	0.444411	0.471181	1.02263	0.95289	1.01191	1.01878	0.952223
M258T154	2.567	258.108	2'-O-Methylcytidine	[M+H]+	0.0295913	-1.41579	HMDB0242132	-	0.722688	1.42678	1.05237	0.659774	0.90361	0.332626	0.385501	0.344993	0.353407	0.369502
M146T49	0.817	146.06	3-Formylindole	[M+H]+	0.00268085	2.00144	HMDB0029737	C08493	0.309406	0.215228	0.529026	0.262736	0.212386	1.40973	1.04052	1.04037	1.07509	1.5555
M117T122	2.037	117.056	3-Hydroxy-3-methylbutanoic acid	[M-H]-	0.0332287	0.323806	HMDB0000754	C20827	0.764517	0.691229	0.667967	0.762663	0.532569	0.847892	0.806182	0.943958	0.845552	0.835662
M103T175	2.916	103.04	3-Hydroxybutyric acid	[M-H]-	0.0467925	0.393847	HMDB0000357	C01089	4.27443	3.46992	5.48484	3.92874	3.70389	5.85106	5.2667	5.44665	5.46803	5.37776
M188T95	1.578	188.072	3-Indolepropionic acid	[M-H]-	0.00789786	3.26978	HMDB0002302	-	0.0874251	0.179795	0.0954115	0.058986	0.0906073	0.67036	1.29501	1.05197	1.09558	0.827497
M212T77	1.285	212.002	3-Indoxyl sulfate	[M-H]-	0.0065489	2.18701	HMDB0000682	-	1.60203	2.53518	1.98291	0.720257	1.78802	5.45948	10.1501	8.20817	8.5565	6.91596
M258T122	2.035	258.108	3-Methylcytidine	[M+H]+	0.000363974	1.11435	HMDB0240577	-	0.22344	0.180982	0.239814	0.222703	0.192264	0.396585	0.504522	0.457663	0.462554	0.471824
M168T366	6.098	168.078	3-Methylhistidine	[M-H]-	0.00766025	1.23528	HMDB0000479	C01152	0.182054	0.10566	0.091238	0.174223	0.212193	0.26291	0.457308	0.37556	0.363891	0.342219
M137T57	0.951	137.024	4-Hydroxybenzoic acid	[M-H]-	0.000258099	0.681079	HMDB0000500	C00156	0.439932	0.41501	0.453988	0.47529	0.392735	0.746148	0.684268	0.652317	0.681256	0.726408
M150T67	1.113	150.054	4-Hydroxymandelonitrile	[M+H]+	0.000347143	1.26833	HMDB0060318	C03742	0.864455	0.922456	0.95892	0.865249	0.955633	1.99935	2.37606	2.26691	2.21132	2.14674
M181T152	2.538	181.051	4-Hydroxyphenyllactic acid	[M-H]-	0.0112177	-0.43925	HMDB0000755	C03672	0.467565	0.538916	0.468486	0.428741	0.536321	0.334097	0.38899	0.392282	0.340726	0.343471
M138T36	0.602	138.02	4-Nitrophenol	[M-H]-	0.0413295	0.594921	HMDB0001232	C00870	0.928732	0.784006	0.911738	0.829487	0.778609	0.90973	1.56041	1.43507	1.27299	1.21463
M184T58	0.961	184.06	4-Pyridxic acid	[M+H]+	0.00169166	1.00853	HMDB0000017	C00847	0.143579	0.123189	0.0736517	0.139301	0.104896	0.200963	0.256111	0.24487	0.254316	0.219909
M154T54	0.904	154.05	5-Aminosalicylic acid	[M+H]+	0.0214204	0.946518	HMDB0014389	-	1.22224	1.23162	0.556935	1.29009	1.3901	1.91363	2.41802	2.4055	2.20204	2.02857
M204T182_4	3.033	204.123	Acetylcarnitine	[M]+	0.018567	0.379609	HMDB0000201	C02571	173.031	239.004	207.549	180.429	212.565	248.91	263.694	264.702	272.127	267.922
M157T162	2.708	157.036	Allantoin	[M-H]-	0.000766705	0.863559	HMDB0000462	C01551	5.29503	5.23715	5.66094	5.05077	3.95612	8.91572	9.51062	9.43051	8.88052	9.11457
M241T461	7.69	241.129	Anserine	[M+H]+	0.00938572	2.09575	HMDB0000194	C01262	3.97264	2.1652	2.00826	3.78185	5.05256	9.43494	19.6946	15.7372	15.38	12.3362
M448T36	0.601	448.34	Arachidonoylcarnitine	[M+H]+	0.00235558	2.05643	HMDB0006455	-	0.0793102	0.286869	0.144122	0.00818256	0.106983	0.613418	0.519714	0.541541	0.471933	0.455065
M456T34	0.574	456.403	Arachidoylcarnitine	[M+H]+	0.0214204	6.22507	HMDB0006460	-	0	0.0093384	0	0	0.000766746	0.168449	0.115999	0.162069	0.147279	0.162123
M175T599_1	9.989	175.118	Arginine	[M+H]+	0.001821	-1.11409	HMDB0000517	C00062	186.18	166.89	131.29	160.693	176.628	91.2848	60.9123	71.9891	73.035	82.3798
M131T327	5.452	131.046	Asparagine	[M-H]-	0.0146834	-1.34285	HMDB0000168	C00152	5.76328	7.52435	7.68591	5.03716	8.44126	2.58476	2.90691	2.7797	2.76484	2.54617
M132T406	6.762	132.03	Aspartic acid	[M-H]-	0.00455378	0.99752	HMDB0000191	C00049	3.99014	4.60195	3.47027	3.34746	4.09464	6.39224	9.27121	8.09411	7.97067	7.21368
M187T301	5.023	187.098	Azelaic acid	[M-H]-	0.0484963	0.595072	HMDB0000784	C08261	0.102452	0.179515	0.25886	0.253013	0.210374	0.360426	0.27788	0.265699	0.292733	0.320177
M664T532	8.867	664.112	beta-Nicotinamide adenine dinucleotide	[M+H]+	0.00568782	-1.05429	HMDB0000902	C00003	0.233506	0.185151	0.241386	0.229935	0.275915	0.114671	0.109441	0.114702	0.120027	0.102577
M335T575	9.588	335.062	beta-Nicotinamide mononucleotide	[M+H]+	0.00558491	-2.77444	HMDB0000229	C00455	0.161293	0.170479	0.189115	0.142827	0.246899	0.0270552	0.0300278	0.0220709	0.033172	0.0207633
M232T115	1.909	232.153	Butyrylcarnitine	[M+H]+	0.00243725	0.760725	HMDB0002013	C02862	10.3974	11.347	9.34591	9.79314	9.82825	19.0818	15.0071	16.4238	16.6696	18.7407
M162T284_2	4.727	162.112	Carnitine	[M+H]+	0.00156128	-0.891136	HMDB0000062	C00318	1727.87	1628.65	1459.93	1736.05	1578.97	890.934	871.245	883.705	886.513	852.01
M225T393	6.542	225.099	Carnosine	[M-H]-	0.00718615	1.39105	HMDB0000033	C00386	14.3277	8.09797	9.31065	11.9799	25.6208	26.914	44.7832	38.3059	38.6086	33.2379
M407T73	1.212	407.28	Cholic acid	[M-H]-	0.000308053	2.56689	HMDB0000619	C00695	0.206935	0.466273	0.219922	0.302377	0.204571	1.55487	1.92749	1.74756	1.4232	1.64278
M191T543	9.05	191.02	Citric acid	[M-H]-	0.00758551	-1.05473	HMDB0000094	C00158	4.55549	4.23594	3.40976	3.86177	3.18743	1.66898	1.9016	2.04023	1.9359	1.72017
M114T92	1.541	114.066	Creatinine	[M+H]+	3.62859e-06	0.992328	HMDB0000562	C00791	96.7825	92.5225	88.2649	93.9905	85.9733	181.119	187.937	186.14	179.917	175.101
M200T358	5.964	199.969	Cysteine S-sulfate	[M-H]-	0.0436923	-0.531321	HMDB0000731	C05824	0.427985	0.333776	0.351332	0.307689	0.257245	0.201421	0.281873	0.237003	0.239229	0.201535
M112T87	1.444	112.05	Cytosine	[M+H]+	0.0214204	1.50439	HMDB0000630	C00380	0.149264	0.154065	0.14866	0.149065	0.122128	0.365136	0.48281	0.428886	0.393268	0.381606
M146T340_1	5.674	146.117	Deoxycarnitine	[M+H]+	0.0214204	-1.0433	HMDB0001161	C01181	38.7595	42.073	45.021	36.7721	73.8912	25.355	19.9179	22.6466	23.8223	23.0203
M391T50	0.831	391.285	Deoxycholic acid	[M-H]-	0.00470335	1.99586	HMDB0000626	C04483	0.00953335	0.0569079	0.0336507	0.0172348	0.106333	0.153072	0.1734	0.197267	0.163508	0.204829
M228T117	1.954	228.097	Deoxycytidine	[M+H]+	0.0214204	0.986525	HMDB0000014	C00881	2.41781	1.83196	2.04905	2.2515	2.11745	4.16782	4.45916	4.22909	4.14089	4.1402
M193T400	6.673	193.035	D-Glucuronic acid	[M-H]-	0.00019928	1.33022	HMDB0000127	C00191	4.67302	4.77271	3.75383	3.59443	4.43524	9.66519	11.745	10.7053	11.1356	10.1281
M106T212	3.539	106.086	Dimethanolamine	[M+H]+	0.0364786	1.25696	-	-	2.71727	3.40224	5.41619	4.689	4.3399	14.742	5.47505	8.853	9.35533	10.7222
M143T238_1	3.974	143.081	Ectoine	[M+H]+	0.0157361	-0.603945	HMDB0240650	C06231	16.5715	12.7313	16.2869	14.616	19.1018	12.2606	8.7594	10.3411	10.414	10.4055
M309T31	0.509	309.279	Eicosenoic acid	[M-H]-	0.0362825	-4.65845	HMDB0002231	C16526	12.3641	4.9865	7.37224	13.4222	19.8714	0.439764	0.496909	0.445369	0.485137	0.43012
M230T282	4.696	230.095	Ergothioneine	[M+H]+	0.0214204	2.10371	HMDB0003045	C05570	0.402942	0.219594	0.0655612	0.02172	0.318761	0.5238	1.35541	0.91358	0.999408	0.628782
M259T475	7.917	259.022	Fructose-6-phosphate	[M-H]-	0.0258383	-3.2185	HMDB0000124	C00085	0.527238	0.10663	0.104397	0.601399	0.556415	0.020274	0.0554001	0.0447389	0.0485513	0.0347361
M195T317	5.287	195.051	Gluconate	[M-H]-	0.0277943	-0.817275	HMDB0000625	C00257	26.254	22.7365	28.0117	22.7121	36.7319	15.8293	17.2303	15.4868	15.4016	13.4869
M179T327	5.448	179.056	Glucose	[M-H]-	0.0258383	0.650704	HMDB0000122	C00221	11.3796	11.6765	10.5534	11.1096	7.22375	15.6114	17.1984	16.4721	16.4308	15.8342
M146T397_2	6.614	146.046	Glutamic acid	[M-H]-	0.0188094	-0.473802	HMDB0000148	C00025	190.306	218.407	219.974	169.017	193.543	136.946	147.096	145.198	142.817	141.706
M147T362_1	6.039	147.076	Glutamine	[M+H]+	0.00716495	-1.24005	HMDB0000641	C00064	54.2454	60.6694	69.9496	52.3035	75.737	28.1321	25.6971	26.589	26.4275	25.6249
M105T261	4.358	105.019	Glyceric acid	[M-H]-	0.0194542	0.88687	HMDB0000139	C00258	18.6562	14.0985	8.8054	15.9183	7.15919	19.4243	28.3256	24.8577	24.2707	22.6469
M171T439	7.317	171.006	Glycerol-3-phosphate	[M-H]-	0.0258383	-4.84066	HMDB0000126	C00093	1.23129	0.821737	0.830045	1.15511	4.85843	0.122679	0.00767753	0.049595	0.0723304	0.0582021
M75T227	3.79	75.0087	Glycolic acid	[M-H]-	0.0258383	1.34431	HMDB0000115	C03547	2.27065	1.5591	1.98269	2.09859	1.833	4.72142	5.10732	5.08068	5.13382	4.69766
M284T172	2.861	284.098	Guanosine	[M+H]+	0.00241048	1.1801	HMDB0000133	C00387	0.188822	0.325834	0.307545	0.139038	0.321268	0.511634	0.553748	0.588592	0.695956	0.556129
M260T66	1.099	260.185	Hexanoylcarnitine	[M+H]+	0.00760392	0.409302	HMDB0000705	-	0.882973	0.981109	0.815345	0.862429	1.05528	1.16726	1.23388	1.22086	1.25151	1.23169
M178T109	1.824	178.051	Hippuric acid	[M-H]-	0.000177353	1.14198	HMDB0000714	C01586	2.73393	3.2733	3.01483	2.68114	2.09578	5.96216	6.27896	5.74203	6.65608	5.81294
M154T522	8.696	154.062	Histidine	[M-H]-	0.0258383	-2.25318	HMDB0000177	C00135	0.766768	0.562313	0.641791	0.62583	1.59659	0.192645	0.0570241	0.246743	0.156981	0.226196
M132T246	4.101	132.065	Hydroxyproline	[M+H]+	0.00497218	1.32323	HMDB0000725	C01157	0.354043	0.268753	0.226988	0.19042	0.176412	0.782683	0.454235	0.594293	0.585314	0.62777
M110T320	5.334	110.027	Hypotaurine	[M+H]+	0.0439974	-0.498131	HMDB0000965	C00519	1.11675	1.64762	1.45031	1.07755	1.40677	0.947505	0.92895	1.00422	0.974781	0.887582
M269T125	2.08	269.087	Inosine	[M+H]+	0.00575774	0.479463	HMDB0000195	C00294	4.84905	5.74827	4.48011	4.49123	5.55807	6.76893	7.34525	7.06257	6.96204	6.89354
M132T153	2.557	132.102	Isoleucine	[M+H]+	0.0214204	0.771347	HMDB0000172	C00407	8.76817	13.105	9.87188	9.01297	9.17663	16.5199	17.7159	17.6242	18.0014	15.3703
M246T90	1.503	246.169	Isovalerylcarnitine	[M+H]+	0.0214204	0.288274	HMDB0000688	-	5.99455	6.73283	5.63776	5.81164	7.17874	7.77923	7.62879	7.62101	7.90053	7.36112
M190T109	1.81	190.05	Kynurenic acid	[M+H]+	0.00612679	1.5765	HMDB0000715	C01717	0.125835	0.073866	0.131163	0.102706	0.0878784	0.213662	0.384951	0.346415	0.312308	0.297861
M209T144	2.407	209.091	Kynurenine	[M+H]+	0.0113014	2.27197	HMDB0000684	C00328	0.199478	0.0664439	0.195132	0.134346	0.105302	0.411711	0.900188	0.78885	0.731996	0.551526
M132T141	2.344	132.102	Leucine	[M+H]+	0.0174418	0.343227	HMDB0000687	C00123	15.8816	19.6667	19.092	15.4416	19.7299	22.2991	22.3968	23.8736	23.5841	21.7807
M424T37	0.61	424.341	Linoleoylcarnitine	[M+H]+	0.000147679	1.53117	HMDB0240780	-	0.436495	0.512319	0.336665	0.377931	0.33646	1.3046	1.1313	1.14086	1.02128	1.182
M512T40	0.668	512.299	LPC 14:0	[M+FA-H]-	0.0378931	-2.58562	-	-	2.68169	1.02974	1.45125	2.7378	3.45725	0.40048	0.351239	0.41766	0.338136	0.384573
M526T40	0.664	526.315	LPC 15:0	[M+FA-H]-	0.0413295	-2.65354	-	-	5.00143	1.67753	2.69266	5.48021	2.82352	0.55804	0.559658	0.560608	0.53002	0.600803
M540T39	0.657	540.329	LPC 16:0	[M+FA-H]-	0.0203924	-1.39273	-	-	37.6599	24.2474	27.5442	41.4447	42.1382	12.2717	13.7551	13.5185	12.9105	13.4431
M538T40	0.663	538.313	LPC 16:1	[M+FA-H]-	0.0229264	-2.43944	-	-	7.525	3.51754	4.84462	7.78385	8.2132	1.23396	1.16941	1.14288	1.11877	1.213
M566T39	0.652	566.345	LPC 18:1	[M+FA-H]-	0.0258383	-2.91401	-	-	27.2339	12.7481	18.3187	30.6964	35.8918	3.49146	3.25676	3.28117	3.20162	3.33882
M594T38	0.632	594.378	LPC 20:1	[M+FA-H]-	0.0399236	-3.24867	-	-	0.748823	0.399338	0.670774	0.803131	1.46917	0.0996154	0.0668484	0.0751147	0.0780843	0.110773
M588T39	0.65	588.331	LPC 20:4	[M+FA-H]-	0.000200713	1.68897	-	-	0.680995	0.62165	0.447601	0.452656	0.369125	1.51182	1.90978	1.69061	1.56903	1.61167
M452T40	0.671	452.278	LPE 16:0	[M-H]-	0.00715918	-1.19417	-	-	8.77082	5.92423	6.71801	7.77676	9.37633	2.24395	4.0465	4.27242	3.30997	2.98199
M450T40	0.671	450.261	LPE 16:1	[M-H]-	0.0146454	-1.09344	-	-	1.16464	1.46119	1.41294	1.13014	1.81389	0.635769	0.675977	0.783392	0.614013	0.563289
M480T40	0.663	480.307	LPE 18:1	[M+H]+	0.0123183	-2.05081	-	-	17.849	10.6925	13.7173	17.6082	22.358	3.00012	5.05919	4.58618	3.47778	3.72166
M476T40	0.672	476.278	LPE 18:2	[M-H]-	0.0258383	-0.642786	-	-	1.33194	1.31537	2.0305	1.98411	1.39395	0.788186	1.16912	1.23367	1.00186	0.966745
M506T40	0.66	506.324	LPE 20:1	[M-H]-	0.0227888	-3.28322	-	-	2.26682	1.19187	1.99205	2.33063	3.4207	0.197472	0.271762	0.238978	0.210787	0.231672
M504T40	0.666	504.309	LPE 20:2	[M-H]-	0.0405778	-0.877307	-	-	0.454259	0.354178	0.668986	0.57385	0.693311	0.23067	0.364645	0.320324	0.271884	0.30658
M436T40	0.668	436.283	LPE O-16:1	[M-H]-	0.0159087	-2.17498	-	-	18.9188	9.20797	10.8972	14.0076	16.655	1.84596	4.2275	3.58082	3.03507	2.74236
M462T40	0.662	462.299	LPE O-18:2	[M-H]-	0.0176709	-3.74363	-	-	90.0624	43.2025	53.1255	50.7053	86.3221	2.85661	7.11088	5.38245	4.71571	4.07892
M490T39	0.65	490.33	LPE O-20:2	[M-H]-	0.0198812	-4.62804	-	-	1.11297	0.434343	0.537829	0.816877	0.917541	0.0106811	0.0440654	0.0435425	0.0292613	0.0269163
M483T38	0.641	483.272	LPG 16:0	[M-H]-	0.0418329	-0.587024	-	-	0.865964	0.765745	0.894641	0.947483	1.52509	0.545257	0.819274	0.729756	0.629605	0.603967
M509T40	0.661	509.288	LPG 18:1	[M-H]-	0.0258383	-2.78699	-	-	0.813068	1.06736	1.17433	0.764846	1.60172	0.262876	0.0120817	0.247219	0.0130485	0.250258
M597T41	0.684	597.303	LPI 18:1	[M-H]-	0.0468737	-4.76328	-	-	1.73555	0.320499	0.672892	1.74271	1.80933	0.0482553	0.0350459	0.0579833	0.0491287	0.0408667
M522T59	0.985	522.284	LPS 18:1	[M-H]-	0.0463299	-5.41368	-	-	8.57096	2.54099	3.73865	8.41237	12.5699	0.160092	0.17308	0.177616	0.18095	0.148888
M550T57	0.954	550.313	LPS 20:1	[M-H]-	0.0450721	-6.48814	-	-	1.18168	0.26052	0.437041	1.2299	1.37491	0.0177769	0.000279293	0.00878819	0.0120968	0.01101
M147T605	10.087	147.112	Lysine	[M+H]+	0.0214204	-0.547542	HMDB0000182	C00047	40.1711	35.9516	37.4705	38.9695	51.7852	25.6221	30.9612	29.0774	27.4436	26.7073
M133T500	8.338	133.014	Malic acid	[M-H]-	0.0387383	-0.769949	HMDB0000744	C03668	26.1698	20.5941	20.8891	16.6127	30.6891	10.3316	18.1364	14.038	13.141	11.7669
M161T387	6.455	161.046	Meglutol	[M-H]-	0.0258383	-0.953436	HMDB0000355	C03761	1.85922	4.1131	2.50268	1.49933	2.21431	0.80459	1.3854	1.30426	1.39715	1.40283
M127T103	1.722	127.072	Melamine	[M+H]+	0.000737019	1.17616	HMDB0041922	C08737	0.25378	0.195239	0.211886	0.217886	0.118554	0.424727	0.504199	0.46724	0.456788	0.400801
M150T173	2.877	150.058	Methionine	[M+H]+	0.0264933	0.327885	HMDB0000696	C00073	5.00815	5.42074	5.00007	4.62238	6.42841	6.89735	6.49205	6.70799	6.63944	6.49982
M227T33	0.549	227.201	Myristic acid	[M-H]-	0.0363513	-0.880934	HMDB0000806	C06424	3.80841	2.98994	3.01495	4.54963	5.24701	1.82188	2.59343	1.99509	2.22112	2.01698
M225T33	0.555	225.185	Myristoleic acid	[M-H]-	0.0008569	1.0687	HMDB0002000	C08322	0.339981	0.444924	0.378147	0.370813	0.407068	0.787736	0.841592	0.695758	0.876482	0.869615
M372T38	0.635	372.31	Myristoylcarnitine	[M+H]+	0.00497218	1.35325	HMDB0005066	-	0.240676	0.39334	0.263836	0.201133	0.175096	0.857725	0.524292	0.578968	0.616707	0.67741
M104T196	3.26	104.07	N,N-Dimethylglycine	[M+H]+	0.000145532	1.03438	HMDB0000092	C01026	2.55294	3.42167	2.88744	2.38222	2.89329	5.40766	6.01635	5.96108	6.02595	5.54592
M189T591	9.857	189.159	N6,N6,N6-Trimethyl-L-lysine	[M+H]+	0.000185838	1.46271	HMDB0001325	C03793	6.1942	6.4629	5.2441	5.07863	6.06708	15.3193	16.1644	14.5151	16.3362	17.7258
M303T525	8.745	303.084	N-Acetylaspartylglutamic acid	[M-H]-	0.0258383	-4.15286	HMDB0001067	C12270	0.042354	1.23402	0.431155	0.0431216	0.145753	0.014393	0.0242283	0.0234998	0.0266241	0.0178644
M220T166	2.768	220.083	N-Acetylglucosamine	[M-H]-	0.00549037	1.49437	HMDB0000215	C00140	1.12537	1.94037	1.31608	0.95851	0.39889	3.15854	3.06905	3.14647	3.5697	3.22593
M220T149	2.491	220.083	N-Acetylmannosamine	[M-H]-	0.0258383	2.29691	HMDB0001129	C00645	0.544877	0.923184	0.744993	0.503559	0.411348	3.98031	1.67262	3.85816	2.02679	3.83306
M190T105	1.755	190.054	N-Acetylmethionine	[M-H]-	0.0258383	1.00867	HMDB0011745	C02712	0.196886	0.379256	0.219589	0.177021	0.185481	0.4045	0.524253	0.474566	0.486311	0.440793
M308T337	5.614	308.099	N-Acetylneuraminic acid	[M-H]-	0.000683924	1.17747	HMDB0000230	C19910	0.447015	0.472411	0.422301	0.399209	0.430473	0.863952	1.06011	1.00661	1.01808	0.962548
M206T78	1.306	206.082	N-Acetylphenylalanine	[M-H]-	0.0429196	-0.600121	HMDB0000512	C03519	0.378868	0.296959	0.393029	0.370948	0.513031	0.278942	0.262339	0.23059	0.277959	0.238452
M131T192	3.198	131.118	N-Acetylputrescine	[M+H]+	0.00159993	0.739096	HMDB0002064	C02714	0.28912	0.230453	0.318545	0.222513	0.264204	0.455594	0.450399	0.436905	0.461995	0.406429
M146T226	3.772	146.046	N-Acetylserine	[M-H]-	0.00281587	2.06336	HMDB0002931	-	0.720072	0.653742	0.650832	0.589684	0.501305	2.07129	2.96882	2.85019	2.7644	2.36736
M163T756	12.6	163.123	Nicotine	[M+H]+	0.00205481	0.896867	HMDB0014330	C16150	0.223931	0.226917	0.236569	0.245337	0.192624	0.453142	0.348543	0.420016	0.413222	0.460549
M158T98	1.634	158.082	N-Isovalerylglycine	[M-H]-	0.000779471	1.89256	HMDB0000678	-	0.322102	0.474356	0.453365	0.398499	0.311153	1.66195	1.29496	1.28642	1.57175	1.46035
M154T66	1.099	154.097	N-omega-Acetylhistamine	[M+H]+	0.00012513	0.930816	HMDB0013253	C05135	0.287951	0.250294	0.238699	0.294357	0.318275	0.480639	0.55193	0.545389	0.536701	0.534367
M286T56	0.94	286.2	Octenoylcarnitine	[M+H]+	0.0226793	-1.47367	-	-	0.312584	0.315106	0.239965	0.329082	0.514571	0.13807	0.114874	0.116567	0.11891	0.127762
M281T31_1	0.522	281.248	Oleic acid	[M-H]-	0.0258383	-3.75741	HMDB0000207	C00712	293.831	157.724	199.033	310.388	450.659	20.6872	22.6349	20.4372	21.6552	18.9687
M140T491	8.187	140.012	O-Phosphoethanolamine	[M-H]-	0.0258383	-5.75601	HMDB0000224	C00346	2.29801	0.90664	1.57688	2.29627	7.33745	0.0962904	0.0179442	0.034914	0.0515365	0.0660571
M133T605	10.088	133.097	Ornithine	[M+H]+	0.012596	1.07341	HMDB0000214	C00077	6.63029	6.12618	8.32029	6.6219	6.79949	11.1604	18.0527	16.6111	14.4154	12.3585
M613T598	9.969	613.157	Oxidized glutathione	[M+H]+	0.0214204	-3.20098	HMDB0003337	C00127	0.220892	0.171048	0.139002	0.156505	0.652774	0.0393229	0.0234691	0.0291238	0.0287496	0.0250768
M255T32	0.53	255.232	Palmitic acid	[M-H]-	0.013193	-1.27127	HMDB0000220	C00249	55.4555	40.6	39.2589	60.4306	59.7767	17.864	24.6038	21.838	21.8323	19.7235
M253T32	0.536	253.217	Palmitoleic acid	[M-H]-	0.0253133	-2.06354	HMDB0003229	C08362	29.9974	20.8537	23.7755	31.709	45.7295	7.42356	7.57801	6.91423	7.59135	6.8711
M400T37	0.61	400.341	Palmitoylcarnitine	[M+H]+	0.00175826	2.58784	HMDB0000222	C02990	0.750356	0.893878	0.733092	0.655059	0.606492	5.24904	3.63548	4.33962	4.05053	4.60212
M218T173	2.875	218.103	Pantothenic acid	[M-H]-	0.00852642	-1.39089	HMDB0000210	C00864	11.5029	11.3708	12.0257	10.0261	15.5834	4.87693	4.12103	4.69387	4.51283	4.86917
M803T32	0.534	802.565	PC 34:2|PC 16:0_18:2	[M+FA-H]-	0.000743648	1.45178	-	-	0.333505	0.652529	0.602076	0.400487	0.434351	1.06978	1.46309	1.43739	1.37042	1.28718
M757T32	0.528	756.551	PC 34:3|PC 16:0_18:3	[M+H]+	0.00558722	1.43603	-	-	0.410062	0.645991	0.563653	0.382375	0.532815	1.04035	1.68596	1.5639	1.38591	1.1827
M787T31	0.524	786.599	PC 36:2|PC 18:1_18:1	[M+H]+	0.0122951	-0.634292	-	-	8.80934	9.11299	9.11068	8.94342	9.47268	4.2933	7.17986	6.67109	6.00327	5.13338
M827T32	0.537	826.565	PC 36:4|PC 16:0_20:4	[M+FA-H]-	0.00320427	2.73054	-	-	0.0138422	0.34869	0.19695	0.133645	0.0364684	0.706053	1.30054	1.02745	0.880308	0.928005
M781T32	0.532	780.551	PC 36:5|PC 16:1_20:4	[M+Na]+	0.0244701	1.67379	-	-	0.406993	0.603909	0.448236	0.361811	0.486441	0.901526	2.19117	1.68703	1.40545	1.1766
M811T31	0.515	810.598	PC 38:4|PC 18:0_20:4	[M+H]+	0.0139267	2.28369	-	-	1.29353	1.57726	1.13148	1.03695	0.647647	3.51676	7.72824	6.41965	5.6181	4.40796
M809T31	0.521	808.582	PC 38:5|PC 18:1_20:4	[M+H]+	0.0349441	1.0422	-	-	1.01402	1.63437	1.29596	0.743422	0.92103	1.40015	3.21427	2.674	2.36708	1.89507
M807T31	0.515	806.563	PC 38:6|PC 18:2_20:4	[M+H]+	0.0214204	1.89507	-	-	0.309569	0.783612	0.385469	0.198027	0.229343	0.806124	2.07767	1.70048	1.40237	1.10262
M727T33	0.544	726.547	PE O-36:3|PE O-18:2_18:1	[M-H]-	0.0258383	-4.95472	-	-	0.414099	1.15142	0.708514	0.871492	0.334166	0.00475153	0.00237132	0.0101687	0.0478044	0.0471113
M723T32	0.541	722.514	PE O-36:5|PE O-16:1_20:4	[M-H]-	0.0340056	2.35522	-	-	0.0857041	0.170888	0.0319782	0.0987027	0.00870261	0.187719	0.674765	0.43309	0.390786	0.33974
M729T33	0.542	728.555	PE P-36:2|PE P-18:1_18:1	[M+H]+	0.0214204	-3.40728	-	-	0.538846	1.70692	0.786775	0.682321	0.602428	0.0553108	0.0990848	0.0852822	0.0901621	0.0770886
M241T32	0.537	241.217	Pentadecanoic acid	[M-H]-	0.0245328	-1.86513	HMDB0000826	C16537	4.07945	2.31309	2.88094	5.09283	4.26108	0.922535	1.12771	0.978898	1.1069	0.977141
M774T29	0.481	773.539	PG 36:2|PG 18:1_18:1	[M-H]-	0.0258383	-4.22062	-	-	0.269807	0.255763	0.267596	0.192494	0.252485	0.00558931	0.0142138	0.0198763	0.0157243	0.0110073
M192T96	1.595	192.066	Phenylacetylglycine	[M-H]-	0.0258383	0.989699	HMDB0000821	C05598	0.903427	1.31018	2.17829	0.963962	0.889129	2.62759	2.51235	2.35876	2.58965	2.31275
M166T135	2.254	166.086	Phenylalanine	[M+H]+	0.00603506	0.370864	HMDB0000159	C00079	12.145	14.7008	12.7995	12.1734	13.9986	15.3722	18.7001	16.9238	17.6397	16.4743
M184T598	9.969	184.073	Phosphocholine	[M]+	0.0214204	-4.04359	HMDB0001565	C00588	16.8439	11.7819	12.0579	16.7001	36.8032	2.2073	0.677513	0.798016	0.904432	1.12424
M97T485	8.091	96.9697	Phosphoric acid	[M-H]-	0.0131554	-4.09534	HMDB0002142	C00009	9.92344	7.05742	6.70135	9.22131	13.8513	0.823154	0.584055	0.123781	0.616549	0.587777
M886T37	0.614	885.557	PI 38:4|PI 18:0_20:4	[M-H]-	0.0188915	1.66494	-	-	0.142268	0.144621	0.0751424	0.0996591	0.0424554	0.201363	0.456138	0.356051	0.291703	0.293397
M116T209_2	3.479	116.07	Proline	[M+H]+	0.0118773	-0.984772	HMDB0000162	C00148	170.153	213.276	247.714	166.343	220.245	99.1083	107.958	106.762	104.608	95.8286
M243T143	2.39	243.062	Pseudouridine	[M-H]-	0.0296461	0.362969	HMDB0000767	C02067	8.66926	8.75643	9.05354	7.44673	8.46495	10.1445	12.1054	10.1617	12.4585	9.64756
M168T67	1.114	168.065	Pyridoxal	[M+H]+	0.000258643	1.18451	HMDB0001545	C00250	0.854438	0.907649	0.976634	0.742035	0.87208	1.78971	2.12889	2.13168	1.97567	1.86743
M169T194	3.229	169.097	Pyridoxamine	[M+H]+	0.0219853	2.58647	HMDB0001431	C00534	0.0943159	0.125264	0.192334	0.0783293	0.0446926	1.03586	0.365743	0.500848	0.586947	0.72356
M128T222	3.701	128.035	Pyroglutamic acid	[M-H]-	0.0229474	0.63073	HMDB0000267	C01879	48.3844	49.212	39.0421	43.5045	30.1201	50.9488	73.8737	73.3425	70.3569	57.0386
M377T70	1.163	377.143	Riboflavin	[M+H]+	0.00577136	1.99919	HMDB0000244	C00255	0.02625	0.0278566	0.0222599	0.0210624	0.0211716	0.0727351	0.119543	0.0981668	0.103938	0.0797524
M399T567	9.452	399.143	S-Adenosylmethionine	[M+H]+	0.0399621	-1.71291	HMDB0001185	C00019	0.425542	0.582415	0.403706	0.178399	0.653264	0.101038	0.16839	0.158124	0.152573	0.10419
M106T384	6.399	106.05	Serine	[M+H]+	0.00333674	0.291981	HMDB0062263	C00716	0.884344	0.868694	0.944048	0.881207	0.995189	1.06404	1.20659	1.1448	1.0957	1.08828
M676T35	0.582	675.539	SM 32:1;2O|SM 18:1;2O/14:0	[M+H]+	0.0358901	-1.58919	-	-	1.97051	1.16737	1.07345	2.10921	0.967174	0.460873	0.531118	0.490706	0.469053	0.470376
M702T34	0.574	701.556	SM 34:2;2O|SM 18:1;2O/16:1	[M+H]+	0.0318417	-0.860046	-	-	4.20012	2.93728	2.83327	4.60406	2.85948	1.74507	2.175	1.99791	1.79527	1.89187
M283T47	0.783	283.263	Stearic acid	[M-H]-	0.0258383	-0.64238	HMDB0000827	C01530	6.05054	4.1929	5.26063	3.8768	4.74865	3.92602	2.39822	3.25171	2.51918	3.36358
M428T35	0.59	428.372	Stearoylcarnitine	[M+H]+	0.00378693	3.8064	HMDB0000848	-	0.119332	0.38642	0.22854	0.15138	0.164294	3.76276	2.12091	2.77839	2.76874	3.25899
M117T421	7.012	117.019	Succinic acid	[M-H]-	0.0151507	0.577912	HMDB0000254	C00042	24.1024	33.5299	25.1101	22.1361	21.7823	36.362	38.1577	39.8956	38.6821	35.9677
M341T291	4.856	341.109	Sucrose	[M-H]-	0.0055191	1.18407	HMDB0000258	C00089	0.201743	0.378542	0.392253	0.194071	0.350006	0.673002	0.66105	0.683521	0.728298	0.700141
M126T303	5.048	126.022	Taurine	[M+H]+	0.00330213	0.337857	HMDB0000251	C00245	11.406	12.5709	10.8519	10.709	10.5207	13.947	14.2802	14.9232	13.8444	13.8563
M223T34	0.566	223.17	Tetradec-5-ynoic acid	[M-H]-	2.01144e-05	2.4088	-	-	0.0946814	0.181336	0.128618	0.171657	0.144375	0.736389	0.775303	0.74908	0.774751	0.791467
M265T162	2.708	265.11	Thiamine	[M]+	0.0290779	1.57197	HMDB0000235	C00378	0.652551	1.0724	0.952052	0.708168	0.937293	1.3543	3.70993	3.07166	2.53841	2.17682
M135T272	4.53	135.03	Threonic acid	[M-H]-	0.0258383	-2.36898	HMDB0000943	C01620	36.6756	33.3012	35.1194	33.8015	48.0156	5.94252	8.19563	7.21823	7.86415	6.96267
M138T176	2.94	138.055	Trigonelline	[M+H]+	0.0108086	0.527246	HMDB0000875	C01004	15.9655	14.7925	21.4335	15.3653	16.6366	25.3238	23.3083	24.3177	24.6971	23.6906
M76T240	3.992	76.0756	Trimethylamine N-oxide	[M+H]+	0.000726716	1.00288	HMDB0000925	C01104	5.05394	4.70326	6.7653	5.32233	4.16213	10.6813	10.8237	11.0205	9.74077	9.85164
M205T160	2.666	205.096	Tryptophan	[M+H]+	0.0260405	0.825344	HMDB0000929	C00078	1.38468	1.58061	1.27701	1.21933	1.77667	1.81285	3.21369	3.08704	2.51918	2.1932
M565T468	7.798	565.047	UDP-D-glucose	[M-H]-	0.0493843	-2.07338	HMDB0000286	C00029	0.547223	0.334693	0.536123	0.513817	1.06081	0.112245	0.159342	0.148595	0.146327	0.144556
M579T534	8.899	579.026	UDP-D-Glucuronic acid	[M-H]-	0.0258383	-3.098	HMDB0000935	C00167	0.0141445	0.0109716	0.0092175	0.0115262	0.0731444	0.00216294	0	0.0024181	0.0048517	0.00446589
M111T60_1	1.007	111.02	Uracil	[M-H]-	0.000157448	1.98758	HMDB0000300	C00106	14.5791	17.2167	11.5556	13.3681	13.8357	51.2577	62.117	56.8137	56.4941	53.1196
M61T97	1.621	61.0397	Urea	[M+H]+	0.000175174	1.01849	HMDB0000294	C00086	5.34478	4.53935	4.41695	5.12084	4.56895	10.0702	8.75501	9.61832	10.5078	9.6493
M606T435	7.248	606.073	Uridine 5'-diphospho-N-acetylglucosamine	[M-H]-	0.0494459	-0.472954	HMDB0000290	C00043	0.382687	0.304149	0.368138	0.311543	0.463527	0.228786	0.270544	0.246853	0.297006	0.275336
M160T107	1.79	160.133	Valine betaine	[M+H]+	1.6424e-05	1.33398	HMDB0240571	-	0.167386	0.168181	0.160887	0.142303	0.126456	0.367034	0.392526	0.400955	0.370173	0.398391
M151T122_1	2.028	151.026	Xanthine	[M-H]-	0.0135622	0.450921	HMDB0000292	C00385	130.986	154.089	128.199	141.61	104.251	167.129	180.318	182.425	187.276	183.832
M151T166	2.768	151.061	Xylitol	[M-H]-	0.000161851	0.951223	HMDB0002917	C00379	7.76996	8.28751	7.95032	7.02628	6.10334	13.6288	15.1802	13.8074	15.3647	13.8246

## Sheet: DM vs M
name	rt(min)	m/z	Metabolite name	Adduct type	DM vs M		HMDB	KEGG	DM					M
					pvalue	Log2FC(DM/M)			DM1	DM2	DM3	DM4	DM5	M1	M2	M3	M4	M5
M111T59	0.986	111.055	1-Acetylimidazole	[M+H]+	0.000322039	1.31397	HMDB0243814	C02560	6.10698	5.30964	6.48386	5.35504	6.16794	2.25054	2.65248	2.68943	2.09336	2.29424
M162T544	9.062	162.076	2-Aminoadipic acid	[M+H]+	0.0184283	-0.394325	HMDB0000510	C00956	0.278831	0.221773	0.231694	0.23951	0.30008	0.296199	0.351523	0.35334	0.351901	0.328407
M103T139	2.311	103.04	2-Hydroxybutyric acid	[M-H]-	0.0140284	-0.642685	HMDB0000008	C05984	8.08806	3.94306	6.83912	8.01887	8.35359	9.87152	11.5214	11.1289	11.5926	10.1475
M117T99	1.654	117.056	2-Hydroxyvaleric acid	[M-H]-	0.0174611	-0.661568	HMDB0001863	-	6.25872	4.07765	6.50354	6.14678	7.21495	8.51832	9.17138	8.51407	9.71855	8.54905
M146T49	0.817	146.06	3-Formylindole	[M+H]+	0.0120406	-2.26999	HMDB0029737	C08493	0.173899	0.172442	0.377987	0.212273	0.302522	1.40973	1.04052	1.04037	1.07509	1.5555
M103T175	2.916	103.04	3-Hydroxybutyric acid	[M-H]-	0.00270284	-0.724133	HMDB0000357	C01089	3.81874	2.34709	3.11619	3.63324	3.66325	5.85106	5.2667	5.44665	5.46803	5.37776
M212T77	1.285	212.002	3-Indoxyl sulfate	[M-H]-	0.0149572	-1.41919	HMDB0000682	-	3.35225	1.48826	4.55376	2.75904	3.41416	5.45948	10.1501	8.20817	8.5565	6.91596
M258T122	2.035	258.108	3-Methylcytidine	[M+H]+	0.00297309	-0.759679	HMDB0240577	-	0.290857	0.242601	0.301156	0.27646	0.288826	0.396585	0.504522	0.457663	0.462554	0.471824
M168T366	6.098	168.078	3-Methylhistidine	[M-H]-	0.0314583	-0.876392	HMDB0000479	C01152	0.227828	0.0566097	0.130226	0.24154	0.246864	0.26291	0.457308	0.37556	0.363891	0.342219
M184T58	0.961	184.06	4-Pyridxic acid	[M+H]+	0.0299019	-0.796201	HMDB0000017	C00847	0.109191	0.223149	0.146672	0.109539	0.128031	0.200963	0.256111	0.24487	0.254316	0.219909
M154T54	0.904	154.05	5-Aminosalicylic acid	[M+H]+	0.0217304	-0.637065	HMDB0014389	-	1.32432	1.69315	1.92296	1.16925	1.23614	1.91363	2.41802	2.4055	2.20204	2.02857
M157T162	2.708	157.036	Allantoin	[M-H]-	8.05604e-05	-0.541539	HMDB0000462	C01551	6.33763	5.9711	6.20945	6.56023	5.9809	8.91572	9.51062	9.43051	8.88052	9.11457
M241T461	7.69	241.129	Anserine	[M+H]+	0.0453923	-1.17381	HMDB0000194	C01262	7.42043	1.26921	3.94026	7.98589	8.59829	9.43494	19.6946	15.7372	15.38	12.3362
M131T327	5.452	131.046	Asparagine	[M-H]-	0.000365611	-1.05783	HMDB0000168	C00152	1.07658	1.26898	1.70141	1.06814	1.36994	2.58476	2.90691	2.7797	2.76484	2.54617
M232T115	1.909	232.153	Butyrylcarnitine	[M+H]+	0.0327875	-0.492667	HMDB0002013	C02862	13.2713	10.3968	14.0281	14.2148	12.7419	19.0818	15.0071	16.4238	16.6696	18.7407
M162T284_2	4.727	162.112	Carnitine	[M+H]+	0.024303	-0.360878	HMDB0000062	C00318	617.849	822.657	727.398	627.728	658.912	890.934	871.245	883.705	886.513	852.01
M225T393	6.542	225.099	Carnosine	[M-H]-	0.0104556	-1.32056	HMDB0000033	C00386	16.2885	3.1232	9.05772	15.9955	19.826	26.914	44.7832	38.3059	38.6086	33.2379
M191T543	9.05	191.02	Citric acid	[M-H]-	0.00666292	-0.530386	HMDB0000094	C00158	1.47191	1.1885	1.07548	1.1419	1.3819	1.66898	1.9016	2.04023	1.9359	1.72017
M176T431	7.186	176.103	Citrulline	[M+H]+	0.0371249	-0.278984	HMDB0000904	C00327	2.50521	2.46171	2.9508	2.4373	2.65634	2.96454	3.21501	3.15268	3.23335	3.08396
M114T92	1.541	114.066	Creatinine	[M+H]+	0.00283639	-0.36903	HMDB0000562	C00791	145.345	141.731	132.09	148.934	151.821	181.119	187.937	186.14	179.917	175.101
M228T117	1.954	228.097	Deoxycytidine	[M+H]+	0.0371249	-0.644353	HMDB0000014	C00881	3.01565	2.01099	2.72065	3.06529	2.98115	4.16782	4.45916	4.22909	4.14089	4.1402
M193T400	6.673	193.035	D-Glucuronic acid	[M-H]-	0.0242838	-0.525321	HMDB0000127	C00191	8.23258	5.21693	7.21487	8.22555	7.75057	9.66519	11.745	10.7053	11.1356	10.1281
M143T238_1	3.974	143.081	Ectoine	[M+H]+	0.00481875	-1.05356	HMDB0240650	C06231	4.97429	4.01817	6.70519	4.50182	5.28163	12.2606	8.7594	10.3411	10.414	10.4055
M230T282	4.696	230.095	Ergothioneine	[M+H]+	0.0339125	0.972826	HMDB0003045	C05570	1.49683	1.31645	2.13828	1.60742	1.69131	0.5238	1.35541	0.91358	0.999408	0.628782
M115T476	7.936	115.004	Fumaric acid	[M-H]-	0.0242838	-0.402565	HMDB0000134	C00122	1.9277	1.53036	1.91416	1.99129	1.94391	2.39035	2.51622	2.63154	2.5715	2.17891
M276T561	9.358	276.118	gamma-Glutamylglutamine	[M+H]+	0.0371249	-0.800769	HMDB0011738	C05283	0.372808	0.322428	0.319022	0.332961	0.37452	0.541373	0.778576	0.708305	0.664799	0.539883
M195T317	5.287	195.051	Gluconate	[M-H]-	0.0218631	-0.738156	HMDB0000625	C00257	11.0599	3.58002	9.49846	11.4975	11.5427	15.8293	17.2303	15.4868	15.4016	13.4869
M179T327	5.448	179.056	Glucose	[M-H]-	0.00337146	0.298621	HMDB0000122	C00221	20.2211	18.859	18.8603	20.7034	21.5964	15.6114	17.1984	16.4721	16.4308	15.8342
M147T362_1	6.039	147.076	Glutamine	[M+H]+	0.00907175	-0.608489	HMDB0000641	C00064	15.6986	19.5442	15.4996	14.4249	17.0779	28.1321	25.6971	26.589	26.4275	25.6249
M274T434	7.227	274.104	Glutamylglutamine	[M-H]-	0.0242838	-0.7274	HMDB0028817	-	1.00107	0.935896	1.01988	0.948294	1.06732	1.54224	1.93528	1.79287	1.90425	1.78276
M105T261	4.358	105.019	Glyceric acid	[M-H]-	0.00728722	-0.955433	HMDB0000139	C00258	13.9764	5.84732	12.8413	13.2443	11.9408	19.4243	28.3256	24.8577	24.2707	22.6469
M75T227	3.79	75.0087	Glycolic acid	[M-H]-	0.0242838	-1.3318	HMDB0000115	C03547	2.13668	1.51136	1.6892	2.30197	2.17123	4.72142	5.10732	5.08068	5.13382	4.69766
M178T109	1.824	178.051	Hippuric acid	[M-H]-	0.011766	-0.780231	HMDB0000714	C01586	4.41818	3.09529	2.99391	4.01507	4.66938	5.96216	6.27896	5.74203	6.65608	5.81294
M112T245	4.082	112.087	Histamine	[M+H]+	0.000490199	1.15559	HMDB0000870	C00388	17.8804	17.5965	17.6166	16.7428	16.7903	7.26123	8.49588	9.37027	7.37837	6.77069
M132T246	4.101	132.065	Hydroxyproline	[M+H]+	0.0474946	-0.780192	HMDB0000725	C01157	0.401558	0.355422	0.326583	0.370227	0.378839	0.782683	0.454235	0.594293	0.585314	0.62777
M190T109	1.81	190.05	Kynurenic acid	[M+H]+	0.0112192	-1.65256	HMDB0000715	C01717	0.0610536	0.0438234	0.12952	0.056572	0.195212	0.213662	0.384951	0.346415	0.312308	0.297861
M209T144	2.407	209.091	Kynurenine	[M+H]+	0.0254363	-2.34616	HMDB0000684	C00328	0.0388219	0.0368988	0.220828	0.0680198	0.265315	0.411711	0.900188	0.78885	0.731996	0.551526
M133T500	8.338	133.014	Malic acid	[M-H]-	0.0118313	-1.53192	HMDB0000744	C03668	7.69859	1.49262	3.38325	6.10269	7.19295	10.3316	18.1364	14.038	13.141	11.7669
M104T196	3.26	104.07	N,N-Dimethylglycine	[M+H]+	0.00123769	-0.718143	HMDB0000092	C01026	3.8777	3.12043	4.07806	3.32914	3.84471	5.40766	6.01635	5.96108	6.02595	5.54592
M189T591	9.857	189.159	N6,N6,N6-Trimethyl-L-lysine	[M+H]+	0.00756673	-0.491506	HMDB0001325	C03793	11.5762	11.277	11.4606	12.2022	11.9536	15.3193	16.1644	14.5151	16.3362	17.7258
M220T166	2.768	220.083	N-Acetylglucosamine	[M-H]-	0.00669673	0.32043	HMDB0000215	C00140	3.94625	3.83867	3.89874	4.14656	3.87302	3.15854	3.06905	3.14647	3.5697	3.22593
M188T416	6.933	188.056	N-Acetylglutamic acid	[M-H]-	0.0113569	-0.806973	HMDB0001138	C00624	0.123911	0.094124	0.126737	0.108417	0.125439	0.166568	0.239324	0.191006	0.203551	0.200875
M220T149	2.491	220.083	N-Acetylmannosamine	[M-H]-	0.0242838	0.524955	HMDB0001129	C00645	4.05019	4.87853	4.10239	4.55346	4.23686	3.98031	1.67262	3.85816	2.02679	3.83306
M190T105	1.755	190.054	N-Acetylmethionine	[M-H]-	0.0261913	-0.344079	HMDB0011745	C02712	0.374432	0.347039	0.433208	0.371488	0.354017	0.4045	0.524253	0.474566	0.486311	0.440793
M131T192	3.198	131.118	N-Acetylputrescine	[M+H]+	0.0371249	-0.418846	HMDB0002064	C02714	0.259254	0.383427	0.381472	0.276282	0.37826	0.455594	0.450399	0.436905	0.461995	0.406429
M146T226	3.772	146.046	N-Acetylserine	[M-H]-	0.00442407	-1.2065	HMDB0002931	-	1.27136	0.730403	1.12189	1.40844	1.45833	2.07129	2.96882	2.85019	2.7644	2.36736
M133T605	10.088	133.097	Ornithine	[M+H]+	0.0461457	-0.798459	HMDB0000214	C00077	7.9305	5.12906	12.7803	9.4557	8.87264	11.1604	18.0527	16.6111	14.4154	12.3585
M613T598	9.969	613.157	Oxidized glutathione	[M+H]+	0.00776091	-2.2272	HMDB0003337	C00127	0.00544686	0	0	0.00725965	0.0144954	0.0393229	0.0234691	0.0291238	0.0287496	0.0250768
M218T173	2.875	218.103	Pantothenic acid	[M-H]-	0.0071644	-0.384592	HMDB0000210	C00864	3.52383	3.15724	3.58705	3.58512	3.94285	4.87693	4.12103	4.69387	4.51283	4.86917
M192T96	1.595	192.066	Phenylacetylglycine	[M-H]-	0.0242838	-1.75717	HMDB0000821	C05598	0.445835	0.466966	1.56455	0.440439	0.728484	2.62759	2.51235	2.35876	2.58965	2.31275
M318T34	0.559	318.299	Phytosphingosine	[M+H]+	0.04218	-0.330887	HMDB0004610	C12144	11.6153	14.294	10.2043	12.1192	11.0432	16.4151	13.8195	13.579	14.1141	14.8107
M128T222	3.701	128.035	Pyroglutamic acid	[M-H]-	0.00760385	-1.2097	HMDB0000267	C01879	28.5668	23.1331	35.4725	31.3252	32.5651	50.9488	73.8737	73.3425	70.3569	57.0386
M399T567	9.452	399.143	S-Adenosylmethionine	[M+H]+	0.0297136	-1.32233	HMDB0001185	C00019	0.0623652	0.0305677	0.0753296	0.0897875	0.057327	0.101038	0.16839	0.158124	0.152573	0.10419
M341T291	4.856	341.109	Sucrose	[M-H]-	0.0230401	-0.784411	HMDB0000258	C00089	0.296635	0.403767	0.382245	0.469772	0.61875	0.673002	0.66105	0.683521	0.728298	0.700141
M265T162	2.708	265.11	Thiamine	[M]+	0.0300309	0.913871	HMDB0000235	C00378	4.97609	3.43023	4.95406	4.79318	5.46834	1.3543	3.70993	3.07166	2.53841	2.17682
M76T240	3.992	76.0756	Trimethylamine N-oxide	[M+H]+	0.00168633	-0.586563	HMDB0000925	C01104	6.87887	5.6584	6.83541	7.08832	8.09535	10.6813	10.8237	11.0205	9.74077	9.85164
M160T107	1.79	160.133	Valine betaine	[M+H]+	0.0054757	-0.782415	HMDB0240571	-	0.248993	0.183121	0.21917	0.25671	0.273957	0.367034	0.392526	0.400955	0.370173	0.398391
M151T166	2.768	151.061	Xylitol	[M-H]-	0.0157363	0.335319	HMDB0002917	C00379	20.0097	15.4785	18.4629	18.6186	19.2548	13.6288	15.1802	13.8074	15.3647	13.8246
